# Supplementary material
Source: publisher figshare collection journal article supplement (https://asha.figshare.com/ndownloader/files/15738896)
Supplement: Supplementary file 1 [file 15738896]

## Sheet: Blad1
Supplemental material, Witte & Köbler, “Linguistic Materials and Metrics for the Creation of Well-Controlled Swedish Speech Perception Tests,” JSLHR, https://doi.org/10.1044/2019_JSLHR-S-18-0454
	Supplemental Material S5. Swedish stress and syllable structure-based normalized phonotactic probabilities (SSPP).
	Explanation of symbols
	*	word start marker
	_	word end marker
	.	syllable boundary, signalling an intersyllabic transition
	Explanation of stress types (ST)
	Ante_Stress	Unstressed syllable prior to the first stressed syllable
	Stressed	Stressed syllable
	Inter_Stress	Unstressed syllable between two stressed syllables
	Post_Stress	Unstressed syllable after the last stressed syllable
	Stress type (ST)	Intrasyllabic position (ISL)	First phoneme in the transition	Second phoneme in the transition	Transitional propbability	Normalized transitional probability (SSPP)
	Ante_Stress	Onset	*	ɪ	0.0331378	1
	Ante_Stress	Onset	*	f	0.0323612	0.976563
	Ante_Stress	Onset	*	s	0.0320627	0.967556
	Ante_Stress	Onset	*	p	0.0320451	0.967024
	Ante_Stress	Onset	*	b	0.0317794	0.959007
	Ante_Stress	Onset	*	k	0.0311342	0.939538
	Ante_Stress	Onset	*	e̞	0.0306309	0.924349
	Ante_Stress	Onset	*	m	0.0304948	0.920242
	Ante_Stress	Onset	*	a	0.0303722	0.916541
	Ante_Stress	Onset	*	d	0.0301056	0.908496
	Ante_Stress	Onset	*	t	0.030067	0.907332
	Ante_Stress	Onset	*	r	0.0299906	0.905028
	Ante_Stress	Onset	*	h	0.0293634	0.886101
	Ante_Stress	Onset	*	ʝ	0.028587	0.86267
	Ante_Stress	Onset	*	u	0.0283076	0.854239
	Ante_Stress	Onset	*	n	0.0282898	0.853701
	Ante_Stress	Onset	*	v	0.0279213	0.842582
	Ante_Stress	Onset	*	ɔ	0.0275378	0.831008
	Ante_Stress	Onset	*	l	0.0274805	0.829279
	Ante_Stress	Onset	*	ɡ	0.0273994	0.826831
	Ante_Stress	Onset	*	ɛ̝	0.0272227	0.821501
	Ante_Stress	Onset	*	ʊ	0.0267456	0.807101
	Ante_Stress	Onset	*	ɧ	0.0260807	0.787037
	Ante_Stress	Onset	*	i	0.0260052	0.784758
	Ante_Stress	Onset	*	ɵ	0.0254769	0.768815
	Ante_Stress	Onset	*	ø	0.0248617	0.750251
	Ante_Stress	Onset	*	ɕ	0.0242218	0.730941
	Ante_Stress	Onset	*	ʉ	0.0233637	0.705046
	Ante_Stress	Onset	*	ʉ̞	0.0233548	0.704777
	Ante_Stress	Onset	*	e͡ʉ	0.0231074	0.697313
	Ante_Stress	Onset	*	o	0.0229095	0.691341
	Ante_Stress	Onset	*	a͡u	0.0226913	0.684757
	Ante_Stress	Onset	*	ø̞	0.0200964	0.606448
	Ante_Stress	Onset	*	ɑ	0.0189379	0.571489
	Ante_Stress	Onset	*	ʂ	0.0185284	0.559132
	Ante_Stress	Onset	*	e	0.0167364	0.505054
	Ante_Stress	Onset	*	ʏ	0.015676	0.473055
	Ante_Stress	Onset	*	ɛ	0.0149156	0.450107
	Ante_Stress	Onset	b	e̞	0.0746343	1
	Ante_Stress	Onset	b	a	0.0623709	0.835687
	Ante_Stress	Onset	b	r	0.0607628	0.814141
	Ante_Stress	Onset	b	l	0.0602936	0.807853
	Ante_Stress	Onset	b	ɪ	0.0601731	0.80624
	Ante_Stress	Onset	b	ʉ	0.0589967	0.790476
	Ante_Stress	Onset	b	ʊ	0.0543343	0.728007
	Ante_Stress	Onset	b	ɵ	0.0487518	0.653209
	Ante_Stress	Onset	b	i	0.0476193	0.638034
	Ante_Stress	Onset	b	ɛ̝	0.046058	0.617115
	Ante_Stress	Onset	b	ʝ	0.0459822	0.6161
	Ante_Stress	Onset	b	ɔ	0.0442038	0.592272
	Ante_Stress	Onset	b	y	0.0436393	0.584708
	Ante_Stress	Onset	b	ʉ̞	0.0413259	0.553711
	Ante_Stress	Onset	b	ʏ	0.0410534	0.550061
	Ante_Stress	Onset	b	ɑ	0.0402982	0.539942
	Ante_Stress	Onset	b	u	0.0401798	0.538355
	Ante_Stress	Onset	b	e	0.0367025	0.491765
	Ante_Stress	Onset	b	a͡u	0.0239236	0.320545
	Ante_Stress	Onset	b	o	0.0238761	0.319908
	Ante_Stress	Onset	b	ø	0.0192181	0.257496
	Ante_Stress	Onset	b	ɛ	0.0173786	0.23285
	Ante_Stress	Onset	b	ø̞	0.00822352	0.110184
	Ante_Stress	Onset	ɕ	i	0.153904	1
	Ante_Stress	Onset	ɕ	ɪ	0.147651	0.959376
	Ante_Stress	Onset	ɕ	ø	0.134096	0.871301
	Ante_Stress	Onset	ɕ	e̞	0.131914	0.85712
	Ante_Stress	Onset	ɕ	a	0.12988	0.843902
	Ante_Stress	Onset	ɕ	ʉ	0.112542	0.731251
	Ante_Stress	Onset	ɕ	ɛ̝	0.0689163	0.447789
	Ante_Stress	Onset	ɕ	ɛ	0.0561338	0.364734
	Ante_Stress	Onset	ɕ	ø̞	0.0386927	0.251408
	Ante_Stress	Onset	ɕ	ʏ	0.02627	0.170691
	Ante_Stress	Onset	d	e̞	0.0765449	1
	Ante_Stress	Onset	d	ɪ	0.0746575	0.975343
	Ante_Stress	Onset	d	a	0.0619487	0.809312
	Ante_Stress	Onset	d	ɛ	0.0618103	0.807503
	Ante_Stress	Onset	d	ʉ	0.0617913	0.807256
	Ante_Stress	Onset	d	i	0.0604552	0.789801
	Ante_Stress	Onset	d	ɔ	0.0580472	0.758342
	Ante_Stress	Onset	d	ʊ	0.0575223	0.751484
	Ante_Stress	Onset	d	r	0.0572608	0.748068
	Ante_Stress	Onset	d	ɛ̝	0.0518969	0.677992
	Ante_Stress	Onset	d	ʉ̞	0.0512956	0.670137
	Ante_Stress	Onset	d	e	0.0488284	0.637905
	Ante_Stress	Onset	d	ʏ	0.0476769	0.622862
	Ante_Stress	Onset	d	ɵ	0.0470072	0.614112
	Ante_Stress	Onset	d	ʝ	0.0440731	0.575782
	Ante_Stress	Onset	d	ɑ	0.0330977	0.432395
	Ante_Stress	Onset	d	u	0.0304917	0.39835
	Ante_Stress	Onset	d	ø̞	0.0296476	0.387323
	Ante_Stress	Onset	d	o	0.0218302	0.285194
	Ante_Stress	Onset	d	ø	0.0179214	0.234129
	Ante_Stress	Onset	d	v	0.0061952	0.0809355
	Ante_Stress	Onset	f	ø̞	0.0757482	1
	Ante_Stress	Onset	f	a	0.0675373	0.891603
	Ante_Stress	Onset	f	ɵ	0.0641398	0.84675
	Ante_Stress	Onset	f	e̞	0.0632855	0.835471
	Ante_Stress	Onset	f	ɪ	0.0623875	0.823617
	Ante_Stress	Onset	f	r	0.060721	0.801616
	Ante_Stress	Onset	f	ɔ	0.0591743	0.781198
	Ante_Stress	Onset	f	ʊ	0.0589935	0.778811
	Ante_Stress	Onset	f	ø	0.0576483	0.761052
	Ante_Stress	Onset	f	l	0.0533346	0.704103
	Ante_Stress	Onset	f	u	0.0522145	0.689316
	Ante_Stress	Onset	f	ʏ	0.0437584	0.577682
	Ante_Stress	Onset	f	y	0.0432212	0.57059
	Ante_Stress	Onset	f	ɑ	0.0414434	0.547121
	Ante_Stress	Onset	f	i	0.0373645	0.493272
	Ante_Stress	Onset	f	ʉ	0.0370852	0.489585
	Ante_Stress	Onset	f	ʉ̞	0.036008	0.475364
	Ante_Stress	Onset	f	ɛ̝	0.0351562	0.464119
	Ante_Stress	Onset	f	ʝ	0.0264146	0.348715
	Ante_Stress	Onset	f	o	0.0243638	0.321642
	Ante_Stress	Onset	ɡ	a	0.0902254	1
	Ante_Stress	Onset	ɡ	r	0.0847049	0.938814
	Ante_Stress	Onset	ɡ	u	0.0818711	0.907406
	Ante_Stress	Onset	ɡ	ɪ	0.0806984	0.894409
	Ante_Stress	Onset	ɡ	ʊ	0.0795029	0.881159
	Ante_Stress	Onset	ɡ	e̞	0.07444	0.825045
	Ante_Stress	Onset	ɡ	l	0.0740111	0.820291
	Ante_Stress	Onset	ɡ	ʉ	0.0730809	0.809981
	Ante_Stress	Onset	ɡ	ʉ̞	0.0690233	0.76501
	Ante_Stress	Onset	ɡ	ɔ	0.0573809	0.635973
	Ante_Stress	Onset	ɡ	ɵ	0.0544247	0.603208
	Ante_Stress	Onset	ɡ	e	0.0518633	0.574819
	Ante_Stress	Onset	ɡ	ʏ	0.0373679	0.414161
	Ante_Stress	Onset	ɡ	o	0.036486	0.404387
	Ante_Stress	Onset	ɡ	n	0.0243293	0.269651
	Ante_Stress	Onset	ɡ	ɑ	0.0175077	0.194044
	Ante_Stress	Onset	ɡ	i	0.0130821	0.144994
	Ante_Stress	Onset	h	a	0.0765473	1
	Ante_Stress	Onset	h	ɪ	0.0660689	0.863112
	Ante_Stress	Onset	h	e̞	0.0659573	0.861653
	Ante_Stress	Onset	h	ʉ	0.0657724	0.859239
	Ante_Stress	Onset	h	ʊ	0.0655546	0.856393
	Ante_Stress	Onset	h	ʉ̞	0.0628608	0.821202
	Ante_Stress	Onset	h	ɛ̝	0.060887	0.795416
	Ante_Stress	Onset	h	ɛ	0.0602784	0.787466
	Ante_Stress	Onset	h	ʏ	0.0585115	0.764384
	Ante_Stress	Onset	h	ɔ	0.057196	0.747197
	Ante_Stress	Onset	h	u	0.0541979	0.708032
	Ante_Stress	Onset	h	ɵ	0.050033	0.653622
	Ante_Stress	Onset	h	o	0.0496672	0.648843
	Ante_Stress	Onset	h	ø	0.0453898	0.592963
	Ante_Stress	Onset	h	e	0.0452068	0.590573
	Ante_Stress	Onset	h	y	0.041639	0.543964
	Ante_Stress	Onset	h	ɑ	0.0365271	0.477184
	Ante_Stress	Onset	h	ø̞	0.0254986	0.333109
	Ante_Stress	Onset	h	e͡ʉ	0.0122065	0.159464
	Ante_Stress	Onset	ɧ	ʊ	0.105361	1
	Ante_Stress	Onset	ɧ	e̞	0.0935622	0.888017
	Ante_Stress	Onset	ɧ	a	0.0925931	0.87882
	Ante_Stress	Onset	ɧ	ɪ	0.0754932	0.71652
	Ante_Stress	Onset	ɧ	ʉ̞	0.0737986	0.700437
	Ante_Stress	Onset	ɧ	ɔ	0.0733177	0.695873
	Ante_Stress	Onset	ɧ	ɵ	0.0684977	0.650125
	Ante_Stress	Onset	ɧ	ø̞	0.068041	0.64579
	Ante_Stress	Onset	ɧ	ʏ	0.0601503	0.570898
	Ante_Stress	Onset	ɧ	i	0.0551611	0.523545
	Ante_Stress	Onset	ɧ	ø	0.0499799	0.474369
	Ante_Stress	Onset	ɧ	ɛ̝	0.0484086	0.459455
	Ante_Stress	Onset	ɧ	ʉ	0.0477239	0.452957
	Ante_Stress	Onset	ɧ	u	0.0454458	0.431334
	Ante_Stress	Onset	ɧ	ɛ	0.0424659	0.403052
	Ante_Stress	Onset	ʝ	e̞	0.0769769	1
	Ante_Stress	Onset	ʝ	ʊ	0.0684838	0.889666
	Ante_Stress	Onset	ʝ	ø̞	0.0670133	0.870564
	Ante_Stress	Onset	ʝ	a	0.0665643	0.86473
	Ante_Stress	Onset	ʝ	ʉ	0.061682	0.801305
	Ante_Stress	Onset	ʝ	ɪ	0.0615101	0.799072
	Ante_Stress	Onset	ʝ	ʏ	0.05974	0.776077
	Ante_Stress	Onset	ʝ	ɑ	0.0594177	0.771889
	Ante_Stress	Onset	ʝ	ø	0.0542183	0.704345
	Ante_Stress	Onset	ʝ	ʉ̞	0.0537363	0.698083
	Ante_Stress	Onset	ʝ	ɵ	0.0523958	0.680668
	Ante_Stress	Onset	ʝ	e	0.0500347	0.649996
	Ante_Stress	Onset	ʝ	ɔ	0.0489518	0.635928
	Ante_Stress	Onset	ʝ	ɛ	0.045053	0.585279
	Ante_Stress	Onset	ʝ	ɛ̝	0.0416781	0.541436
	Ante_Stress	Onset	ʝ	u	0.0375044	0.487216
	Ante_Stress	Onset	ʝ	i	0.0352357	0.457744
	Ante_Stress	Onset	ʝ	o	0.0322026	0.418341
	Ante_Stress	Onset	ʝ	y	0.0276013	0.358566
	Ante_Stress	Onset	k	ɔ	0.079295	1
	Ante_Stress	Onset	k	a	0.0754849	0.951951
	Ante_Stress	Onset	k	ʊ	0.0708701	0.893754
	Ante_Stress	Onset	k	ʉ	0.0684606	0.863366
	Ante_Stress	Onset	k	r	0.0667698	0.842043
	Ante_Stress	Onset	k	l	0.0615189	0.775823
	Ante_Stress	Onset	k	ɵ	0.060617	0.764449
	Ante_Stress	Onset	k	v	0.0598778	0.755127
	Ante_Stress	Onset	k	ʉ̞	0.0590958	0.745266
	Ante_Stress	Onset	k	e̞	0.0590869	0.745153
	Ante_Stress	Onset	k	ɪ	0.0546535	0.689243
	Ante_Stress	Onset	k	ɑ	0.0513116	0.647098
	Ante_Stress	Onset	k	o	0.0420293	0.530038
	Ante_Stress	Onset	k	u	0.0401832	0.506756
	Ante_Stress	Onset	k	ʏ	0.0390253	0.492153
	Ante_Stress	Onset	k	s	0.0350767	0.442357
	Ante_Stress	Onset	k	a͡u	0.0315826	0.398293
	Ante_Stress	Onset	k	ø	0.0296803	0.374303
	Ante_Stress	Onset	k	n	0.0153807	0.193969
	Ante_Stress	Onset	l	ɪ	0.0721721	1
	Ante_Stress	Onset	l	a	0.0702041	0.972732
	Ante_Stress	Onset	l	e̞	0.0699465	0.969162
	Ante_Stress	Onset	l	ʊ	0.0667691	0.925138
	Ante_Stress	Onset	l	ʉ	0.0594176	0.823276
	Ante_Stress	Onset	l	i	0.0587529	0.814067
	Ante_Stress	Onset	l	ɔ	0.0554145	0.76781
	Ante_Stress	Onset	l	ʉ̞	0.0523043	0.724715
	Ante_Stress	Onset	l	ʏ	0.0501381	0.694701
	Ante_Stress	Onset	l	ɵ	0.0478351	0.662792
	Ante_Stress	Onset	l	e	0.0465075	0.644398
	Ante_Stress	Onset	l	ø	0.0440386	0.610188
	Ante_Stress	Onset	l	ɑ	0.0437847	0.606671
	Ante_Stress	Onset	l	a͡u	0.038821	0.537894
	Ante_Stress	Onset	l	ɛ̝	0.038795	0.537535
	Ante_Stress	Onset	l	ɛ	0.0384133	0.532246
	Ante_Stress	Onset	l	o	0.0336516	0.466269
	Ante_Stress	Onset	l	e͡ʉ	0.0336068	0.465647
	Ante_Stress	Onset	l	ø̞	0.0329239	0.456186
	Ante_Stress	Onset	l	y	0.0234784	0.325311
	Ante_Stress	Onset	l	u	0.023025	0.319028
	Ante_Stress	Onset	m	e̞	0.0788861	1
	Ante_Stress	Onset	m	ɪ	0.0761581	0.965418
	Ante_Stress	Onset	m	a	0.0757415	0.960137
	Ante_Stress	Onset	m	ʊ	0.0736026	0.933023
	Ante_Stress	Onset	m	ʉ	0.0687552	0.871575
	Ante_Stress	Onset	m	ɔ	0.0613021	0.777096
	Ante_Stress	Onset	m	ʉ̞	0.0608527	0.771399
	Ante_Stress	Onset	m	ø̞	0.0518849	0.657719
	Ante_Stress	Onset	m	ɵ	0.050638	0.641913
	Ante_Stress	Onset	m	ʏ	0.0494167	0.62643
	Ante_Stress	Onset	m	a͡u	0.0446336	0.565798
	Ante_Stress	Onset	m	o	0.0443829	0.56262
	Ante_Stress	Onset	m	ɛ	0.0438661	0.556069
	Ante_Stress	Onset	m	ɛ̝	0.0387323	0.49099
	Ante_Stress	Onset	m	ɑ	0.0352304	0.446599
	Ante_Stress	Onset	m	ø	0.0347547	0.440568
	Ante_Stress	Onset	m	e	0.0338785	0.429461
	Ante_Stress	Onset	m	u	0.0318635	0.403917
	Ante_Stress	Onset	m	y	0.0287759	0.364778
	Ante_Stress	Onset	m	l	0.0166439	0.210987
	Ante_Stress	Onset	n	a	0.0756185	1
	Ante_Stress	Onset	n	ɪ	0.074524	0.985526
	Ante_Stress	Onset	n	ʊ	0.0742331	0.981679
	Ante_Stress	Onset	n	e̞	0.0724266	0.957789
	Ante_Stress	Onset	n	ʉ	0.0659848	0.872601
	Ante_Stress	Onset	n	ɛ̝	0.0627243	0.829483
	Ante_Stress	Onset	n	ʏ	0.0589415	0.779458
	Ante_Stress	Onset	n	ɔ	0.0586128	0.775112
	Ante_Stress	Onset	n	e	0.0530989	0.702195
	Ante_Stress	Onset	n	ʉ̞	0.0463712	0.613225
	Ante_Stress	Onset	n	u	0.0453679	0.599958
	Ante_Stress	Onset	n	ɵ	0.0442282	0.584886
	Ante_Stress	Onset	n	y	0.0440342	0.582321
	Ante_Stress	Onset	n	ɛ	0.0414285	0.547862
	Ante_Stress	Onset	n	ø̞	0.0378852	0.501004
	Ante_Stress	Onset	n	o	0.0344585	0.455689
	Ante_Stress	Onset	n	ʝ	0.0290163	0.38372
	Ante_Stress	Onset	n	ɑ	0.02868	0.379272
	Ante_Stress	Onset	n	a͡u	0.0267072	0.353184
	Ante_Stress	Onset	n	i	0.025658	0.339309
	Ante_Stress	Onset	ɳ	u	1	1
	Ante_Stress	Onset	p	r	0.0695473	1
	Ante_Stress	Onset	p	e̞	0.0678193	0.975154
	Ante_Stress	Onset	p	ʊ	0.0650081	0.934732
	Ante_Stress	Onset	p	a	0.0641882	0.922942
	Ante_Stress	Onset	p	l	0.0602194	0.865877
	Ante_Stress	Onset	p	ɪ	0.0597164	0.858644
	Ante_Stress	Onset	p	ɛ̝	0.0569826	0.819335
	Ante_Stress	Onset	p	ɵ	0.0568174	0.81696
	Ante_Stress	Onset	p	ɔ	0.0556019	0.799483
	Ante_Stress	Onset	p	ʉ	0.054087	0.777701
	Ante_Stress	Onset	p	s	0.0494727	0.711353
	Ante_Stress	Onset	p	ʏ	0.0462585	0.665137
	Ante_Stress	Onset	p	e	0.0445485	0.640549
	Ante_Stress	Onset	p	a͡u	0.041207	0.592503
	Ante_Stress	Onset	p	o	0.0377465	0.542746
	Ante_Stress	Onset	p	ʉ̞	0.0373302	0.536759
	Ante_Stress	Onset	p	ɛ	0.0356379	0.512426
	Ante_Stress	Onset	p	ʝ	0.0249996	0.359462
	Ante_Stress	Onset	p	t	0.0210059	0.302037
	Ante_Stress	Onset	p	ø	0.0191404	0.275214
	Ante_Stress	Onset	p	n	0.0178535	0.25671
	Ante_Stress	Onset	p	ɑ	0.0148118	0.212975
	Ante_Stress	Onset	r	e̞	0.0718071	1
	Ante_Stress	Onset	r	a	0.0679431	0.946189
	Ante_Stress	Onset	r	ʊ	0.0678068	0.944292
	Ante_Stress	Onset	r	ɪ	0.0669581	0.932472
	Ante_Stress	Onset	r	ʉ	0.0585302	0.815104
	Ante_Stress	Onset	r	ɔ	0.0548987	0.764531
	Ante_Stress	Onset	r	ʉ̞	0.0540357	0.752512
	Ante_Stress	Onset	r	ɵ	0.0517064	0.720074
	Ante_Stress	Onset	r	e	0.0506242	0.705003
	Ante_Stress	Onset	r	i	0.0500818	0.697449
	Ante_Stress	Onset	r	ʏ	0.0453419	0.631441
	Ante_Stress	Onset	r	ø	0.0397925	0.554158
	Ante_Stress	Onset	r	ɛ̝	0.0395345	0.550566
	Ante_Stress	Onset	r	ɛ	0.0392664	0.546832
	Ante_Stress	Onset	r	ɑ	0.0384385	0.535303
	Ante_Stress	Onset	r	u	0.0374457	0.521476
	Ante_Stress	Onset	r	ø̞	0.0357203	0.497449
	Ante_Stress	Onset	r	a͡u	0.0338851	0.471891
	Ante_Stress	Onset	r	y	0.0334909	0.466402
	Ante_Stress	Onset	r	e͡ʉ	0.0329278	0.458559
	Ante_Stress	Onset	r	o	0.0297645	0.414506
	Ante_Stress	Onset	s	e̞	0.0561342	1
	Ante_Stress	Onset	s	ɪ	0.0524105	0.933665
	Ante_Stress	Onset	s	ʊ	0.0492707	0.877731
	Ante_Stress	Onset	s	o	0.048382	0.861899
	Ante_Stress	Onset	s	p	0.0483385	0.861125
	Ante_Stress	Onset	s	t	0.0474559	0.845401
	Ante_Stress	Onset	s	a	0.0456939	0.814012
	Ante_Stress	Onset	s	ɵ	0.0455672	0.811755
	Ante_Stress	Onset	s	ʏ	0.0446708	0.795787
	Ante_Stress	Onset	s	ʉ	0.0431034	0.767864
	Ante_Stress	Onset	s	ɛ̝	0.0423219	0.753942
	Ante_Stress	Onset	s	k	0.0410871	0.731944
	Ante_Stress	Onset	s	ɔ	0.038536	0.686498
	Ante_Stress	Onset	s	ʉ̞	0.0376325	0.670403
	Ante_Stress	Onset	s	ø	0.0362583	0.645922
	Ante_Stress	Onset	s	i	0.035407	0.630756
	Ante_Stress	Onset	s	l	0.0350902	0.625112
	Ante_Stress	Onset	s	v	0.0334292	0.595523
	Ante_Stress	Onset	s	y	0.0296776	0.52869
	Ante_Stress	Onset	s	e	0.0276021	0.491717
	Ante_Stress	Onset	s	ɛ	0.0267799	0.477069
	Ante_Stress	Onset	s	ø̞	0.0262772	0.468114
	Ante_Stress	Onset	s	m	0.0261755	0.466302
	Ante_Stress	Onset	s	n	0.0258043	0.459689
	Ante_Stress	Onset	s	r	0.0217437	0.387352
	Ante_Stress	Onset	s	u	0.0210687	0.375328
	Ante_Stress	Onset	s	ɑ	0.0140819	0.250861
	Ante_Stress	Onset	ʂ	ɪ	0.140529	1
	Ante_Stress	Onset	ʂ	ʊ	0.139152	0.990203
	Ante_Stress	Onset	ʂ	e̞	0.131328	0.934526
	Ante_Stress	Onset	ʂ	a	0.116754	0.830819
	Ante_Stress	Onset	ʂ	o	0.109645	0.78023
	Ante_Stress	Onset	ʂ	ʏ	0.0985761	0.701465
	Ante_Stress	Onset	ʂ	ɔ	0.093807	0.667529
	Ante_Stress	Onset	ʂ	v	0.0883758	0.62888
	Ante_Stress	Onset	ʂ	ɑ	0.0818334	0.582324
	Ante_Stress	Onset	t	e̞	0.0673371	1
	Ante_Stress	Onset	t	ɪ	0.0658638	0.978121
	Ante_Stress	Onset	t	r	0.0628148	0.932841
	Ante_Stress	Onset	t	a	0.0621238	0.922579
	Ante_Stress	Onset	t	ʉ	0.0610192	0.906176
	Ante_Stress	Onset	t	ʊ	0.0599932	0.890938
	Ante_Stress	Onset	t	ʏ	0.0572035	0.84951
	Ante_Stress	Onset	t	ɵ	0.049747	0.738776
	Ante_Stress	Onset	t	e	0.0488645	0.725669
	Ante_Stress	Onset	t	v	0.0481799	0.715503
	Ante_Stress	Onset	t	u	0.0481037	0.714372
	Ante_Stress	Onset	t	ɔ	0.0438502	0.651204
	Ante_Stress	Onset	t	ɛ̝	0.0432687	0.642569
	Ante_Stress	Onset	t	i	0.0402136	0.597198
	Ante_Stress	Onset	t	ʉ̞	0.0378827	0.562583
	Ante_Stress	Onset	t	ɑ	0.0349582	0.519153
	Ante_Stress	Onset	t	ø̞	0.0331786	0.492724
	Ante_Stress	Onset	t	ɕ	0.0321598	0.477594
	Ante_Stress	Onset	t	o	0.0317832	0.472002
	Ante_Stress	Onset	t	ø	0.0312813	0.464548
	Ante_Stress	Onset	t	a͡u	0.0300487	0.446243
	Ante_Stress	Onset	t	s	0.0101244	0.150353
	Ante_Stress	Onset	ʈ	e̞	1	1
	Ante_Stress	Onset	v	e̞	0.0984668	1
	Ante_Stress	Onset	v	a	0.0983639	0.998955
	Ante_Stress	Onset	v	ɪ	0.0933014	0.947541
	Ante_Stress	Onset	v	ʊ	0.0929675	0.944151
	Ante_Stress	Onset	v	ɛ̝	0.0852181	0.86545
	Ante_Stress	Onset	v	ɵ	0.0766794	0.778733
	Ante_Stress	Onset	v	e	0.071936	0.730561
	Ante_Stress	Onset	v	ɑ	0.0678882	0.689453
	Ante_Stress	Onset	v	ɔ	0.0667733	0.67813
	Ante_Stress	Onset	v	o	0.0535084	0.543415
	Ante_Stress	Onset	v	i	0.0515614	0.523642
	Ante_Stress	Onset	v	ɛ	0.0497789	0.505539
	Ante_Stress	Onset	v	r	0.0417393	0.423892
	Ante_Stress	Onset	v	ʉ̞	0.0356982	0.36254
	Ante_Stress	Onset	v	ʉ	0.0161193	0.163703
	Ante_Stress	Nucleus	a	.l	0.0267048	1
	Ante_Stress	Nucleus	a	.t	0.0266428	0.997678
	Ante_Stress	Nucleus	a	.r	0.0262264	0.982086
	Ante_Stress	Nucleus	a	.n	0.0260176	0.97427
	Ante_Stress	Nucleus	a	.ɧ	0.0259314	0.971039
	Ante_Stress	Nucleus	a	n	0.0257204	0.963139
	Ante_Stress	Nucleus	a	.h	0.0255781	0.95781
	Ante_Stress	Nucleus	a	.m	0.0255697	0.957495
	Ante_Stress	Nucleus	a	.s	0.0247388	0.926382
	Ante_Stress	Nucleus	a	.f	0.0246919	0.924626
	Ante_Stress	Nucleus	a	.v	0.0245439	0.919084
	Ante_Stress	Nucleus	a	.p	0.024484	0.916839
	Ante_Stress	Nucleus	a	ʈ	0.0244009	0.913728
	Ante_Stress	Nucleus	a	k	0.0243505	0.911842
	Ante_Stress	Nucleus	a	l	0.0238935	0.894727
	Ante_Stress	Nucleus	a	.b	0.0237063	0.887718
	Ante_Stress	Nucleus	a	.d	0.0237038	0.887624
	Ante_Stress	Nucleus	a	.ɡ	0.0236686	0.886307
	Ante_Stress	Nucleus	a	.k	0.0234579	0.878418
	Ante_Stress	Nucleus	a	r	0.0233754	0.875327
	Ante_Stress	Nucleus	a	t	0.0231058	0.865231
	Ante_Stress	Nucleus	a	p	0.0230292	0.862363
	Ante_Stress	Nucleus	a	m	0.0228558	0.855872
	Ante_Stress	Nucleus	a	s	0.0228207	0.854556
	Ante_Stress	Nucleus	a	ŋ	0.0222881	0.834613
	Ante_Stress	Nucleus	a	ɖ	0.0218493	0.81818
	Ante_Stress	Nucleus	a	.eː	0.0218162	0.81694
	Ante_Stress	Nucleus	a	d	0.0217502	0.81447
	Ante_Stress	Nucleus	a	.ʂ	0.0208514	0.780812
	Ante_Stress	Nucleus	a	.ʝ	0.0206523	0.773358
	Ante_Stress	Nucleus	a	ɡ	0.0200339	0.750201
	Ante_Stress	Nucleus	a	ɭ	0.0194515	0.72839
	Ante_Stress	Nucleus	a	f	0.0186329	0.697736
	Ante_Stress	Nucleus	a	.iː	0.0184985	0.692705
	Ante_Stress	Nucleus	a	ɳ	0.0177395	0.664283
	Ante_Stress	Nucleus	a	ʝ	0.0170223	0.637427
	Ante_Stress	Nucleus	a	ʂ	0.0169582	0.635025
	Ante_Stress	Nucleus	a	.uː	0.0145815	0.546028
	Ante_Stress	Nucleus	a	b	0.0144289	0.540311
	Ante_Stress	Nucleus	a	.oː	0.0137179	0.513688
	Ante_Stress	Nucleus	a	.ʊ	0.0130862	0.490033
	Ante_Stress	Nucleus	a	.ɛ̝	0.0121885	0.456417
	Ante_Stress	Nucleus	a	.i	0.0121584	0.45529
	Ante_Stress	Nucleus	a	.ɪ	0.0114531	0.428878
	Ante_Stress	Nucleus	a	ɱ	0.0113122	0.423602
	Ante_Stress	Nucleus	a	.e̞	0.0106669	0.399439
	Ante_Stress	Nucleus	a	.ɔ	0.00987602	0.369823
	Ante_Stress	Nucleus	a	ɧ	0.00901589	0.337614
	Ante_Stress	Nucleus	a	.ɕ	0.00886232	0.331863
	Ante_Stress	Nucleus	a	v	0.00776317	0.290704
	Ante_Stress	Nucleus	a	.ɑː	0.00412652	0.154524
	Ante_Stress	Nucleus	ɑ	ɭ	0.0495493	1
	Ante_Stress	Nucleus	ɑ	.m	0.0477668	0.964026
	Ante_Stress	Nucleus	ɑ	.ʂ	0.04697	0.947946
	Ante_Stress	Nucleus	ɑ	r	0.0447261	0.902658
	Ante_Stress	Nucleus	ɑ	.ɡ	0.043564	0.879207
	Ante_Stress	Nucleus	ɑ	ʈ	0.0421084	0.84983
	Ante_Stress	Nucleus	ɑ	.v	0.0419283	0.846194
	Ante_Stress	Nucleus	ɑ	.n	0.0390475	0.788055
	Ante_Stress	Nucleus	ɑ	.b	0.0379198	0.765294
	Ante_Stress	Nucleus	ɑ	.s	0.0374906	0.756633
	Ante_Stress	Nucleus	ɑ	ŋ	0.0369626	0.745976
	Ante_Stress	Nucleus	ɑ	.d	0.0366821	0.740316
	Ante_Stress	Nucleus	ɑ	.r	0.0360333	0.727221
	Ante_Stress	Nucleus	ɑ	n	0.0350365	0.707104
	Ante_Stress	Nucleus	ɑ	ʂ	0.034916	0.704673
	Ante_Stress	Nucleus	ɑ	.ʊ	0.0344946	0.696167
	Ante_Stress	Nucleus	ɑ	.k	0.0338448	0.683053
	Ante_Stress	Nucleus	ɑ	d	0.0336442	0.679006
	Ante_Stress	Nucleus	ɑ	v	0.0319387	0.644586
	Ante_Stress	Nucleus	ɑ	m	0.0312361	0.630404
	Ante_Stress	Nucleus	ɑ	l	0.0300294	0.606051
	Ante_Stress	Nucleus	ɑ	.t	0.0273763	0.552507
	Ante_Stress	Nucleus	ɑ	.e̞	0.0272563	0.550086
	Ante_Stress	Nucleus	ɑ	s	0.0258871	0.522452
	Ante_Stress	Nucleus	ɑ	.l	0.0258351	0.521403
	Ante_Stress	Nucleus	ɑ	.i	0.0219951	0.443904
	Ante_Stress	Nucleus	ɑ	ɡ	0.0186546	0.376485
	Ante_Stress	Nucleus	ɑ	.f	0.0186546	0.376485
	Ante_Stress	Nucleus	ɑ	.p	0.0156958	0.316772
	Ante_Stress	Nucleus	ɑ	k	0.0127562	0.257444
	Ante_Stress	Nucleus	a͡u	.t	0.111416	1
	Ante_Stress	Nucleus	a͡u	s	0.103766	0.931342
	Ante_Stress	Nucleus	a͡u	k	0.100747	0.904241
	Ante_Stress	Nucleus	a͡u	.l	0.09386	0.84243
	Ante_Stress	Nucleus	a͡u	.r	0.0924944	0.830173
	Ante_Stress	Nucleus	a͡u	.m	0.0761542	0.683514
	Ante_Stress	Nucleus	a͡u	.s	0.074945	0.672661
	Ante_Stress	Nucleus	a͡u	t	0.0716331	0.642935
	Ante_Stress	Nucleus	a͡u	.ɡ	0.0707938	0.635402
	Ante_Stress	Nucleus	a͡u	.d	0.0629574	0.565067
	Ante_Stress	Nucleus	a͡u	.k	0.0610066	0.547558
	Ante_Stress	Nucleus	a͡u	.ɑː	0.0331119	0.297192
	Ante_Stress	Nucleus	a͡u	.n	0.0269657	0.242028
	Ante_Stress	Nucleus	a͡u	ɡ	0.0201493	0.180848
	Ante_Stress	Nucleus	ɔ	.m	0.0368504	1
	Ante_Stress	Nucleus	ɔ	n	0.0355305	0.964184
	Ante_Stress	Nucleus	ɔ	m	0.0336453	0.913023
	Ante_Stress	Nucleus	ɔ	r	0.0328414	0.89121
	Ante_Stress	Nucleus	ɔ	.p	0.0315182	0.855301
	Ante_Stress	Nucleus	ɔ	k	0.0299469	0.812663
	Ante_Stress	Nucleus	ɔ	ɖ	0.0298189	0.809189
	Ante_Stress	Nucleus	ɔ	.l	0.0293748	0.797137
	Ante_Stress	Nucleus	ɔ	ɱ	0.0290316	0.787824
	Ante_Stress	Nucleus	ɔ	.k	0.0289858	0.786581
	Ante_Stress	Nucleus	ɔ	ŋ	0.0289166	0.784704
	Ante_Stress	Nucleus	ɔ	.f	0.0287499	0.780179
	Ante_Stress	Nucleus	ɔ	.r	0.0286235	0.77675
	Ante_Stress	Nucleus	ɔ	ʈ	0.0282841	0.767538
	Ante_Stress	Nucleus	ɔ	s	0.0278768	0.756486
	Ante_Stress	Nucleus	ɔ	p	0.0277506	0.753062
	Ante_Stress	Nucleus	ɔ	.s	0.0275563	0.747789
	Ante_Stress	Nucleus	ɔ	.b	0.0274592	0.745153
	Ante_Stress	Nucleus	ɔ	.n	0.0257935	0.699951
	Ante_Stress	Nucleus	ɔ	.ʝ	0.025249	0.685176
	Ante_Stress	Nucleus	ɔ	.t	0.0251565	0.682667
	Ante_Stress	Nucleus	ɔ	l	0.0243882	0.661816
	Ante_Stress	Nucleus	ɔ	.v	0.0242653	0.658483
	Ante_Stress	Nucleus	ɔ	.ɡ	0.0241895	0.656424
	Ante_Stress	Nucleus	ɔ	b	0.0239824	0.650804
	Ante_Stress	Nucleus	ɔ	v	0.0235676	0.639549
	Ante_Stress	Nucleus	ɔ	.d	0.0227419	0.617143
	Ante_Stress	Nucleus	ɔ	.ʂ	0.0224373	0.608874
	Ante_Stress	Nucleus	ɔ	ɡ	0.0223893	0.607573
	Ante_Stress	Nucleus	ɔ	ɳ	0.0215225	0.584052
	Ante_Stress	Nucleus	ɔ	t	0.0211983	0.575254
	Ante_Stress	Nucleus	ɔ	f	0.0195688	0.531033
	Ante_Stress	Nucleus	ɔ	.a	0.0189512	0.514275
	Ante_Stress	Nucleus	ɔ	d	0.0184197	0.49985
	Ante_Stress	Nucleus	ɔ	ɭ	0.0173741	0.471477
	Ante_Stress	Nucleus	ɔ	.ɛ̝	0.0171444	0.465244
	Ante_Stress	Nucleus	ɔ	ʝ	0.0138038	0.374591
	Ante_Stress	Nucleus	ɔ	.h	0.0117356	0.318467
	Ante_Stress	Nucleus	ɔ	.ɑː	0.0106353	0.288607
	Ante_Stress	Nucleus	ɔ	.iː	0.00827511	0.22456
	Ante_Stress	Nucleus	ɔ	ʂ	0.00782619	0.212377
	Ante_Stress	Nucleus	ɔ	.ɪ	0.00662371	0.179746
	Ante_Stress	Nucleus	e	.v	0.0419418	1
	Ante_Stress	Nucleus	e	.ʊ	0.0406389	0.968937
	Ante_Stress	Nucleus	e	.ɛ̝	0.0387597	0.924131
	Ante_Stress	Nucleus	e	.ʉ	0.0383639	0.914695
	Ante_Stress	Nucleus	e	t	0.0380713	0.907718
	Ante_Stress	Nucleus	e	.t	0.0377218	0.899385
	Ante_Stress	Nucleus	e	.a	0.0370353	0.883018
	Ante_Stress	Nucleus	e	.d	0.0359219	0.856471
	Ante_Stress	Nucleus	e	.r	0.0343015	0.817837
	Ante_Stress	Nucleus	e	.ɧ	0.0341308	0.813766
	Ante_Stress	Nucleus	e	.l	0.0337256	0.804106
	Ante_Stress	Nucleus	e	.e̞	0.0334837	0.798338
	Ante_Stress	Nucleus	e	.n	0.0319632	0.762086
	Ante_Stress	Nucleus	e	.i	0.0314608	0.750106
	Ante_Stress	Nucleus	e	d	0.0292828	0.698179
	Ante_Stress	Nucleus	e	.p	0.0290894	0.693566
	Ante_Stress	Nucleus	e	.h	0.0282934	0.674589
	Ante_Stress	Nucleus	e	.s	0.0270614	0.645214
	Ante_Stress	Nucleus	e	.ɔ	0.0270614	0.645214
	Ante_Stress	Nucleus	e	k	0.0264388	0.630368
	Ante_Stress	Nucleus	e	.f	0.025653	0.611634
	Ante_Stress	Nucleus	e	.ɡ	0.0253602	0.604652
	Ante_Stress	Nucleus	e	r	0.0246037	0.586617
	Ante_Stress	Nucleus	e	.k	0.0241779	0.576463
	Ante_Stress	Nucleus	e	.ɪ	0.0239394	0.570778
	Ante_Stress	Nucleus	e	.m	0.0234585	0.559312
	Ante_Stress	Nucleus	e	.b	0.0233995	0.557904
	Ante_Stress	Nucleus	e	.ʝ	0.0232379	0.554051
	Ante_Stress	Nucleus	e	ɡ	0.0225959	0.538745
	Ante_Stress	Nucleus	e	.iː	0.0200389	0.47778
	Ante_Stress	Nucleus	e	.ɑː	0.0189722	0.452347
	Ante_Stress	Nucleus	e	.e	0.0172391	0.411024
	Ante_Stress	Nucleus	e	ʈ	0.0147681	0.352109
	Ante_Stress	Nucleus	e	n	0.0137992	0.329008
	Ante_Stress	Nucleus	e	.uː	0.0125501	0.299226
	Ante_Stress	Nucleus	e	.ʉː	0.0114588	0.273208
	Ante_Stress	Nucleus	e̞	.s	0.0270562	1
	Ante_Stress	Nucleus	e̞	.d	0.0264025	0.97584
	Ante_Stress	Nucleus	e̞	n	0.0257744	0.952627
	Ante_Stress	Nucleus	e̞	.r	0.025719	0.950579
	Ante_Stress	Nucleus	e̞	.ʂ	0.0249755	0.923098
	Ante_Stress	Nucleus	e̞	s	0.0248935	0.920067
	Ante_Stress	Nucleus	e̞	k	0.0248798	0.919563
	Ante_Stress	Nucleus	e̞	.n	0.0246084	0.909531
	Ante_Stress	Nucleus	e̞	.h	0.0244766	0.904659
	Ante_Stress	Nucleus	e̞	.l	0.0243333	0.899362
	Ante_Stress	Nucleus	e̞	.t	0.0243043	0.89829
	Ante_Stress	Nucleus	e̞	.m	0.0241574	0.892861
	Ante_Stress	Nucleus	e̞	r	0.0240687	0.889584
	Ante_Stress	Nucleus	e̞	.ʝ	0.0238811	0.882651
	Ante_Stress	Nucleus	e̞	.f	0.0238466	0.881376
	Ante_Stress	Nucleus	e̞	f	0.0236776	0.875127
	Ante_Stress	Nucleus	e̞	.k	0.023425	0.865794
	Ante_Stress	Nucleus	e̞	.b	0.0233269	0.862164
	Ante_Stress	Nucleus	e̞	.v	0.0227851	0.842143
	Ante_Stress	Nucleus	e̞	.ɡ	0.0224385	0.829332
	Ante_Stress	Nucleus	e̞	.p	0.0212965	0.787122
	Ante_Stress	Nucleus	e̞	ɳ	0.0211641	0.78223
	Ante_Stress	Nucleus	e̞	p	0.0209748	0.775232
	Ante_Stress	Nucleus	e̞	ɡ	0.0208025	0.768864
	Ante_Stress	Nucleus	e̞	.ɧ	0.0204793	0.756919
	Ante_Stress	Nucleus	e̞	t	0.0204696	0.756561
	Ante_Stress	Nucleus	e̞	.a	0.0202447	0.748247
	Ante_Stress	Nucleus	e̞	l	0.0197918	0.731508
	Ante_Stress	Nucleus	e̞	.ɑː	0.0193804	0.716302
	Ante_Stress	Nucleus	e̞	.ʊ	0.0193469	0.715064
	Ante_Stress	Nucleus	e̞	m	0.0191554	0.707986
	Ante_Stress	Nucleus	e̞	.ɕ	0.0182989	0.676329
	Ante_Stress	Nucleus	e̞	.iː	0.0182263	0.673647
	Ante_Stress	Nucleus	e̞	d	0.018174	0.671715
	Ante_Stress	Nucleus	e̞	ʈ	0.018025	0.666206
	Ante_Stress	Nucleus	e̞	ʂ	0.0178955	0.661422
	Ante_Stress	Nucleus	e̞	ɭ	0.0176512	0.652391
	Ante_Stress	Nucleus	e̞	ʝ	0.0173766	0.642242
	Ante_Stress	Nucleus	e̞	.ɵ	0.0165437	0.611458
	Ante_Stress	Nucleus	e̞	.oː	0.0158069	0.584226
	Ante_Stress	Nucleus	e̞	.ɔ	0.0152368	0.563153
	Ante_Stress	Nucleus	e̞	.ɛ̝	0.0151495	0.55993
	Ante_Stress	Nucleus	e̞	ŋ	0.0146283	0.540665
	Ante_Stress	Nucleus	e̞	v	0.0143575	0.530657
	Ante_Stress	Nucleus	e̞	.ɪ	0.0140277	0.518468
	Ante_Stress	Nucleus	e̞	ɱ	0.0125806	0.464983
	Ante_Stress	Nucleus	e̞	.ɛː	0.0109056	0.403073
	Ante_Stress	Nucleus	e̞	b	0.0101044	0.373459
	Ante_Stress	Nucleus	e̞	ɖ	0.0097198	0.359245
	Ante_Stress	Nucleus	e̞	.eː	0.00853808	0.315569
	Ante_Stress	Nucleus	e̞	.ʉː	0.00461714	0.17065
	Ante_Stress	Nucleus	e͡ʉ	.r	0.260597	1
	Ante_Stress	Nucleus	e͡ʉ	.f	0.172444	0.661728
	Ante_Stress	Nucleus	e͡ʉ	.m	0.160182	0.614676
	Ante_Stress	Nucleus	e͡ʉ	.k	0.156571	0.600816
	Ante_Stress	Nucleus	e͡ʉ	.ɧ	0.145658	0.558939
	Ante_Stress	Nucleus	e͡ʉ	.n	0.104548	0.401189
	Ante_Stress	Nucleus	ɛ	.r	0.10729	1
	Ante_Stress	Nucleus	ɛ	.ɡ	0.0751517	0.700457
	Ante_Stress	Nucleus	ɛ	.k	0.0740116	0.68983
	Ante_Stress	Nucleus	ɛ	ɳ	0.073876	0.688566
	Ante_Stress	Nucleus	ɛ	r	0.0729269	0.67972
	Ante_Stress	Nucleus	ɛ	v	0.0683686	0.637234
	Ante_Stress	Nucleus	ɛ	.ʂ	0.0615725	0.573891
	Ante_Stress	Nucleus	ɛ	.t	0.059331	0.552999
	Ante_Stress	Nucleus	ɛ	.n	0.0591344	0.551166
	Ante_Stress	Nucleus	ɛ	.v	0.0572185	0.533309
	Ante_Stress	Nucleus	ɛ	.d	0.051166	0.476896
	Ante_Stress	Nucleus	ɛ	n	0.0511239	0.476504
	Ante_Stress	Nucleus	ɛ	s	0.0472087	0.440012
	Ante_Stress	Nucleus	ɛ	t	0.0450687	0.420066
	Ante_Stress	Nucleus	ɛ	.l	0.0431195	0.401898
	Ante_Stress	Nucleus	ɛ	.ɪ	0.0292011	0.272171
	Ante_Stress	Nucleus	ɛ	.s	0.0242311	0.225848
	Ante_Stress	Nucleus	ɛ̝	n	0.0628106	1
	Ante_Stress	Nucleus	ɛ̝	r	0.0584336	0.930314
	Ante_Stress	Nucleus	ɛ̝	.s	0.0544162	0.866353
	Ante_Stress	Nucleus	ɛ̝	.r	0.0519367	0.826877
	Ante_Stress	Nucleus	ɛ̝	s	0.0495652	0.789121
	Ante_Stress	Nucleus	ɛ̝	ʈ	0.0486604	0.774716
	Ante_Stress	Nucleus	ɛ̝	ɖ	0.0472447	0.752176
	Ante_Stress	Nucleus	ɛ̝	ŋ	0.0446475	0.710827
	Ante_Stress	Nucleus	ɛ̝	.n	0.0439015	0.698949
	Ante_Stress	Nucleus	ɛ̝	.l	0.04377	0.696857
	Ante_Stress	Nucleus	ɛ̝	ɭ	0.0434862	0.692338
	Ante_Stress	Nucleus	ɛ̝	l	0.0414536	0.659978
	Ante_Stress	Nucleus	ɛ̝	.m	0.0407736	0.649151
	Ante_Stress	Nucleus	ɛ̝	m	0.0395402	0.629514
	Ante_Stress	Nucleus	ɛ̝	ɳ	0.0395078	0.628998
	Ante_Stress	Nucleus	ɛ̝	.h	0.0390172	0.621188
	Ante_Stress	Nucleus	ɛ̝	.t	0.0330803	0.526666
	Ante_Stress	Nucleus	ɛ̝	.ʂ	0.0325106	0.517596
	Ante_Stress	Nucleus	ɛ̝	.d	0.0307408	0.489421
	Ante_Stress	Nucleus	ɛ̝	.k	0.0302785	0.48206
	Ante_Stress	Nucleus	ɛ̝	.b	0.0279446	0.444903
	Ante_Stress	Nucleus	ɛ̝	ʝ	0.0268651	0.427716
	Ante_Stress	Nucleus	ɛ̝	k	0.0233857	0.37232
	Ante_Stress	Nucleus	ɛ̝	ʂ	0.0217181	0.345771
	Ante_Stress	Nucleus	ɛ̝	t	0.0134216	0.213683
	Ante_Stress	Nucleus	ɛ̝	.ʝ	0.0108898	0.173375
	Ante_Stress	Nucleus	i	.v	0.0646352	1
	Ante_Stress	Nucleus	i	.k	0.0571359	0.883975
	Ante_Stress	Nucleus	i	.l	0.0565283	0.874575
	Ante_Stress	Nucleus	i	.a	0.0562019	0.869526
	Ante_Stress	Nucleus	i	.ʊ	0.054831	0.848316
	Ante_Stress	Nucleus	i	.eː	0.0504993	0.781298
	Ante_Stress	Nucleus	i	.d	0.0502837	0.777962
	Ante_Stress	Nucleus	i	.e̞	0.0484944	0.750279
	Ante_Stress	Nucleus	i	.s	0.0480783	0.743841
	Ante_Stress	Nucleus	i	.t	0.0474751	0.734509
	Ante_Stress	Nucleus	i	s	0.0464397	0.71849
	Ante_Stress	Nucleus	i	.ɛ̝	0.0462241	0.715154
	Ante_Stress	Nucleus	i	.n	0.0433777	0.671117
	Ante_Stress	Nucleus	i	.u	0.0422369	0.653466
	Ante_Stress	Nucleus	i	k	0.0421296	0.651806
	Ante_Stress	Nucleus	i	.p	0.0387021	0.598777
	Ante_Stress	Nucleus	i	.r	0.0382093	0.591154
	Ante_Stress	Nucleus	i	.ɡ	0.0327863	0.507252
	Ante_Stress	Nucleus	i	.ɔ	0.0318503	0.49277
	Ante_Stress	Nucleus	i	.b	0.0223253	0.345404
	Ante_Stress	Nucleus	i	.h	0.0215935	0.334083
	Ante_Stress	Nucleus	i	.m	0.0201404	0.311602
	Ante_Stress	Nucleus	i	.ɵ	0.0118397	0.183178
	Ante_Stress	Nucleus	i	.ɑ	0.00965489	0.149375
	Ante_Stress	Nucleus	i	.f	0.00965489	0.149375
	Ante_Stress	Nucleus	i	ɡ	0.00867245	0.134175
	Ante_Stress	Nucleus	ɪ	.d	0.0277786	1
	Ante_Stress	Nucleus	ɪ	.t	0.0262238	0.94403
	Ante_Stress	Nucleus	ɪ	n	0.0262007	0.943198
	Ante_Stress	Nucleus	ɪ	s	0.026113	0.940043
	Ante_Stress	Nucleus	ɪ	.ʝ	0.0261014	0.939623
	Ante_Stress	Nucleus	ɪ	.ɡ	0.0261012	0.939617
	Ante_Stress	Nucleus	ɪ	l	0.0260951	0.939395
	Ante_Stress	Nucleus	ɪ	.n	0.0260384	0.937357
	Ante_Stress	Nucleus	ɪ	.m	0.0257	0.925175
	Ante_Stress	Nucleus	ɪ	.s	0.0252144	0.907692
	Ante_Stress	Nucleus	ɪ	.r	0.0249758	0.899103
	Ante_Stress	Nucleus	ɪ	k	0.0246723	0.888178
	Ante_Stress	Nucleus	ɪ	.h	0.02446	0.880535
	Ante_Stress	Nucleus	ɪ	.v	0.0243424	0.876301
	Ante_Stress	Nucleus	ɪ	.b	0.0243325	0.875946
	Ante_Stress	Nucleus	ɪ	ɱ	0.0242572	0.873235
	Ante_Stress	Nucleus	ɪ	.k	0.0242308	0.872285
	Ante_Stress	Nucleus	ɪ	.l	0.0241688	0.870054
	Ante_Stress	Nucleus	ɪ	.ɛ̝	0.0240417	0.865478
	Ante_Stress	Nucleus	ɪ	.f	0.0240209	0.864728
	Ante_Stress	Nucleus	ɪ	.a	0.0239312	0.861499
	Ante_Stress	Nucleus	ɪ	.ɑː	0.0239194	0.861073
	Ante_Stress	Nucleus	ɪ	ŋ	0.0234235	0.84322
	Ante_Stress	Nucleus	ɪ	.ɧ	0.0232953	0.838609
	Ante_Stress	Nucleus	ɪ	.uː	0.0225166	0.810575
	Ante_Stress	Nucleus	ɪ	.eː	0.0219773	0.791162
	Ante_Stress	Nucleus	ɪ	.ʊ	0.0209639	0.754678
	Ante_Stress	Nucleus	ɪ	t	0.0208142	0.749288
	Ante_Stress	Nucleus	ɪ	m	0.0206939	0.744961
	Ante_Stress	Nucleus	ɪ	.ɛː	0.0205491	0.739747
	Ante_Stress	Nucleus	ɪ	.øː	0.0203772	0.733557
	Ante_Stress	Nucleus	ɪ	.p	0.0194356	0.699661
	Ante_Stress	Nucleus	ɪ	ɡ	0.0193952	0.698208
	Ante_Stress	Nucleus	ɪ	.ɔ	0.0192356	0.692463
	Ante_Stress	Nucleus	ɪ	.oː	0.0184962	0.665843
	Ante_Stress	Nucleus	ɪ	r	0.0184941	0.665769
	Ante_Stress	Nucleus	ɪ	.e̞	0.0180641	0.650291
	Ante_Stress	Nucleus	ɪ	.ɕ	0.0163932	0.59014
	Ante_Stress	Nucleus	ɪ	.ʂ	0.015907	0.572635
	Ante_Stress	Nucleus	ɪ	f	0.0147531	0.531097
	Ante_Stress	Nucleus	ɪ	ʈ	0.0146508	0.527414
	Ante_Stress	Nucleus	ɪ	.ɵ	0.0139884	0.503569
	Ante_Stress	Nucleus	ɪ	p	0.0133713	0.481353
	Ante_Stress	Nucleus	ɪ	.iː	0.0129331	0.46558
	Ante_Stress	Nucleus	ɪ	.u	0.0123501	0.444589
	Ante_Stress	Nucleus	ɪ	ɭ	0.0114775	0.413178
	Ante_Stress	Nucleus	ɪ	d	0.00713413	0.256821
	Ante_Stress	Nucleus	ɪ	.ʉ	0.00638986	0.230029
	Ante_Stress	Nucleus	o	.k	0.0704343	1
	Ante_Stress	Nucleus	o	.h	0.0697748	0.990637
	Ante_Stress	Nucleus	o	.d	0.0686865	0.975185
	Ante_Stress	Nucleus	o	t	0.0643198	0.913188
	Ante_Stress	Nucleus	o	.v	0.0608623	0.864101
	Ante_Stress	Nucleus	o	.l	0.0557714	0.791821
	Ante_Stress	Nucleus	o	.ɡ	0.0507136	0.720013
	Ante_Stress	Nucleus	o	.ɛ̝	0.0436323	0.619475
	Ante_Stress	Nucleus	o	.n	0.0435919	0.618902
	Ante_Stress	Nucleus	o	.s	0.0423186	0.600824
	Ante_Stress	Nucleus	o	.t	0.0419922	0.59619
	Ante_Stress	Nucleus	o	.r	0.0362403	0.514526
	Ante_Stress	Nucleus	o	l	0.0360874	0.512356
	Ante_Stress	Nucleus	o	s	0.0354729	0.503632
	Ante_Stress	Nucleus	o	.b	0.0322473	0.457835
	Ante_Stress	Nucleus	o	.m	0.0299788	0.425629
	Ante_Stress	Nucleus	o	ɖ	0.0280236	0.397869
	Ante_Stress	Nucleus	o	r	0.0259064	0.36781
	Ante_Stress	Nucleus	o	.p	0.0255342	0.362525
	Ante_Stress	Nucleus	o	.e̞	0.0233717	0.331823
	Ante_Stress	Nucleus	o	.ɵ	0.0232337	0.329864
	Ante_Stress	Nucleus	o	k	0.0197629	0.280586
	Ante_Stress	Nucleus	o	.ɪ	0.0186924	0.265388
	Ante_Stress	Nucleus	o	v	0.0147223	0.209022
	Ante_Stress	Nucleus	o	ɳ	0.0141371	0.200714
	Ante_Stress	Nucleus	o	ɭ	0.0134903	0.19153
	Ante_Stress	Nucleus	o	ɡ	0.0110008	0.156186
	Ante_Stress	Nucleus	ɵ	n	0.0519246	1
	Ante_Stress	Nucleus	ɵ	l	0.0506353	0.975169
	Ante_Stress	Nucleus	ɵ	ŋ	0.0490003	0.943682
	Ante_Stress	Nucleus	ɵ	.b	0.0479217	0.92291
	Ante_Stress	Nucleus	ɵ	.n	0.0448541	0.86383
	Ante_Stress	Nucleus	ɵ	r	0.0433837	0.835514
	Ante_Stress	Nucleus	ɵ	k	0.0430275	0.828653
	Ante_Stress	Nucleus	ɵ	d	0.0409607	0.78885
	Ante_Stress	Nucleus	ɵ	s	0.0405398	0.780743
	Ante_Stress	Nucleus	ɵ	m	0.0375664	0.72348
	Ante_Stress	Nucleus	ɵ	.m	0.0368025	0.708767
	Ante_Stress	Nucleus	ɵ	b	0.0364493	0.701966
	Ante_Stress	Nucleus	ɵ	.f	0.0353252	0.680317
	Ante_Stress	Nucleus	ɵ	.l	0.0348074	0.670346
	Ante_Stress	Nucleus	ɵ	p	0.0344525	0.663511
	Ante_Stress	Nucleus	ɵ	.t	0.0338798	0.65248
	Ante_Stress	Nucleus	ɵ	.p	0.0335033	0.64523
	Ante_Stress	Nucleus	ɵ	.r	0.031759	0.611638
	Ante_Stress	Nucleus	ɵ	.s	0.0316151	0.608864
	Ante_Stress	Nucleus	ɵ	.d	0.0310515	0.598011
	Ante_Stress	Nucleus	ɵ	.ʂ	0.0302999	0.583537
	Ante_Stress	Nucleus	ɵ	t	0.0299764	0.577307
	Ante_Stress	Nucleus	ɵ	.ɕ	0.0294635	0.567429
	Ante_Stress	Nucleus	ɵ	.ɡ	0.0272134	0.524094
	Ante_Stress	Nucleus	ɵ	.k	0.0250386	0.48221
	Ante_Stress	Nucleus	ɵ	ɭ	0.0199583	0.384371
	Ante_Stress	Nucleus	ɵ	ʈ	0.018502	0.356323
	Ante_Stress	Nucleus	ɵ	ʂ	0.0151607	0.291976
	Ante_Stress	Nucleus	ɵ	ɖ	0.0149274	0.287482
	Ante_Stress	Nucleus	u	.e̞	0.0813518	1
	Ante_Stress	Nucleus	u	d	0.0696133	0.855707
	Ante_Stress	Nucleus	u	ɖ	0.0670109	0.823717
	Ante_Stress	Nucleus	u	.k	0.0629937	0.774336
	Ante_Stress	Nucleus	u	.a	0.0613227	0.753796
	Ante_Stress	Nucleus	u	.m	0.0569949	0.700597
	Ante_Stress	Nucleus	u	.ɛ̝	0.0552453	0.679091
	Ante_Stress	Nucleus	u	.f	0.0475147	0.584064
	Ante_Stress	Nucleus	u	.s	0.0447834	0.550491
	Ante_Stress	Nucleus	u	.n	0.044354	0.545212
	Ante_Stress	Nucleus	u	.l	0.0431354	0.530233
	Ante_Stress	Nucleus	u	.d	0.0420192	0.516513
	Ante_Stress	Nucleus	u	.v	0.0407111	0.500433
	Ante_Stress	Nucleus	u	ɳ	0.0388279	0.477284
	Ante_Stress	Nucleus	u	.r	0.0383794	0.471771
	Ante_Stress	Nucleus	u	s	0.0335183	0.412016
	Ante_Stress	Nucleus	u	.ɡ	0.0308845	0.379641
	Ante_Stress	Nucleus	u	.t	0.0288622	0.354782
	Ante_Stress	Nucleus	u	.h	0.0287415	0.353299
	Ante_Stress	Nucleus	u	.ʝ	0.0271536	0.33378
	Ante_Stress	Nucleus	u	.e	0.025444	0.312765
	Ante_Stress	Nucleus	u	.ɧ	0.016829	0.206866
	Ante_Stress	Nucleus	u	.b	0.0143092	0.175893
	Ante_Stress	Nucleus	ʉ	.s	0.04175	1
	Ante_Stress	Nucleus	ʉ	.t	0.0411048	0.984544
	Ante_Stress	Nucleus	ʉ	.m	0.0398957	0.955584
	Ante_Stress	Nucleus	ʉ	.r	0.039767	0.952502
	Ante_Stress	Nucleus	ʉ	.ɛ̝	0.0394458	0.944808
	Ante_Stress	Nucleus	ʉ	.l	0.0389928	0.933959
	Ante_Stress	Nucleus	ʉ	.ɑː	0.0386044	0.924654
	Ante_Stress	Nucleus	ʉ	.n	0.0377802	0.904913
	Ante_Stress	Nucleus	ʉ	.b	0.0374861	0.897869
	Ante_Stress	Nucleus	ʉ	.a	0.0373751	0.895212
	Ante_Stress	Nucleus	ʉ	.d	0.0369019	0.883876
	Ante_Stress	Nucleus	ʉ	.v	0.0356288	0.853384
	Ante_Stress	Nucleus	ʉ	.eː	0.0353576	0.846887
	Ante_Stress	Nucleus	ʉ	.ɧ	0.0349935	0.838166
	Ante_Stress	Nucleus	ʉ	.p	0.0344833	0.825945
	Ante_Stress	Nucleus	ʉ	k	0.0343846	0.823582
	Ante_Stress	Nucleus	ʉ	s	0.0324983	0.778401
	Ante_Stress	Nucleus	ʉ	ɳ	0.031195	0.747186
	Ante_Stress	Nucleus	ʉ	t	0.0302818	0.725311
	Ante_Stress	Nucleus	ʉ	.iː	0.0298828	0.715754
	Ante_Stress	Nucleus	ʉ	.ɡ	0.0297656	0.712948
	Ante_Stress	Nucleus	ʉ	.k	0.0296933	0.711215
	Ante_Stress	Nucleus	ʉ	.e̞	0.029178	0.698873
	Ante_Stress	Nucleus	ʉ	.ɪ	0.0283172	0.678256
	Ante_Stress	Nucleus	ʉ	.øː	0.0208236	0.498768
	Ante_Stress	Nucleus	ʉ	ʂ	0.0195891	0.4692
	Ante_Stress	Nucleus	ʉ	.h	0.0178631	0.427858
	Ante_Stress	Nucleus	ʉ	r	0.0177517	0.425191
	Ante_Stress	Nucleus	ʉ	.ʂ	0.0151707	0.363369
	Ante_Stress	Nucleus	ʉ	.uː	0.0142017	0.34016
	Ante_Stress	Nucleus	ʉ	.f	0.0124216	0.297522
	Ante_Stress	Nucleus	ʉ	.oː	0.0118347	0.283466
	Ante_Stress	Nucleus	ʉ	.ʊ	0.00946778	0.226773
	Ante_Stress	Nucleus	ʉ	.ɔ	0.00664486	0.159158
	Ante_Stress	Nucleus	ʉ	.ʝ	0.00473389	0.113387
	Ante_Stress	Nucleus	ʉ	d	0.00473389	0.113387
	Ante_Stress	Nucleus	ʉ̞	s	0.0515294	1
	Ante_Stress	Nucleus	ʉ̞	.t	0.0513247	0.996027
	Ante_Stress	Nucleus	ʉ̞	.ɑː	0.0492597	0.955953
	Ante_Stress	Nucleus	ʉ̞	.m	0.0488175	0.947371
	Ante_Stress	Nucleus	ʉ̞	.ɧ	0.0484655	0.94054
	Ante_Stress	Nucleus	ʉ̞	.s	0.0454549	0.882116
	Ante_Stress	Nucleus	ʉ̞	.n	0.0451183	0.875584
	Ante_Stress	Nucleus	ʉ̞	.r	0.0451028	0.875283
	Ante_Stress	Nucleus	ʉ̞	.l	0.0425361	0.825473
	Ante_Stress	Nucleus	ʉ̞	.d	0.0424733	0.824254
	Ante_Stress	Nucleus	ʉ̞	.p	0.0399044	0.774401
	Ante_Stress	Nucleus	ʉ̞	.k	0.039767	0.771735
	Ante_Stress	Nucleus	ʉ̞	.b	0.0390896	0.758588
	Ante_Stress	Nucleus	ʉ̞	.ɛ̝	0.0389842	0.756542
	Ante_Stress	Nucleus	ʉ̞	.h	0.0388251	0.753456
	Ante_Stress	Nucleus	ʉ̞	.f	0.0369391	0.716854
	Ante_Stress	Nucleus	ʉ̞	.eː	0.0348782	0.676859
	Ante_Stress	Nucleus	ʉ̞	.ʂ	0.0331868	0.644037
	Ante_Stress	Nucleus	ʉ̞	.a	0.0321198	0.623329
	Ante_Stress	Nucleus	ʉ̞	.ɡ	0.0319958	0.620924
	Ante_Stress	Nucleus	ʉ̞	.ɪ	0.0317927	0.616981
	Ante_Stress	Nucleus	ʉ̞	t	0.0310483	0.602536
	Ante_Stress	Nucleus	ʉ̞	.iː	0.0258608	0.501865
	Ante_Stress	Nucleus	ʉ̞	ɖ	0.0245839	0.477085
	Ante_Stress	Nucleus	ʉ̞	.ʝ	0.0191823	0.372259
	Ante_Stress	Nucleus	ʉ̞	.v	0.017908	0.34753
	Ante_Stress	Nucleus	ʉ̞	.ɔ	0.0138518	0.268813
	Ante_Stress	Nucleus	ʊ	.l	0.0329952	1
	Ante_Stress	Nucleus	ʊ	.t	0.032127	0.973687
	Ante_Stress	Nucleus	ʊ	.r	0.0316332	0.958723
	Ante_Stress	Nucleus	ʊ	.m	0.0314593	0.953452
	Ante_Stress	Nucleus	ʊ	.n	0.0313071	0.948839
	Ante_Stress	Nucleus	ʊ	.s	0.0312353	0.946661
	Ante_Stress	Nucleus	ʊ	.b	0.0309017	0.936551
	Ante_Stress	Nucleus	ʊ	.d	0.0307955	0.933334
	Ante_Stress	Nucleus	ʊ	.k	0.0303994	0.921329
	Ante_Stress	Nucleus	ʊ	ɡ	0.0294429	0.892339
	Ante_Stress	Nucleus	ʊ	.v	0.0286785	0.869174
	Ante_Stress	Nucleus	ʊ	.f	0.0285739	0.866001
	Ante_Stress	Nucleus	ʊ	ɖ	0.027995	0.848458
	Ante_Stress	Nucleus	ʊ	.h	0.0276016	0.836536
	Ante_Stress	Nucleus	ʊ	ʈ	0.0275856	0.836051
	Ante_Stress	Nucleus	ʊ	.p	0.0273982	0.83037
	Ante_Stress	Nucleus	ʊ	.ɛ̝	0.0268966	0.815169
	Ante_Stress	Nucleus	ʊ	r	0.0267582	0.810972
	Ante_Stress	Nucleus	ʊ	.ɧ	0.0265297	0.804048
	Ante_Stress	Nucleus	ʊ	k	0.0260617	0.789863
	Ante_Stress	Nucleus	ʊ	ɳ	0.0258836	0.784465
	Ante_Stress	Nucleus	ʊ	.ɡ	0.0253955	0.769675
	Ante_Stress	Nucleus	ʊ	s	0.024904	0.754778
	Ante_Stress	Nucleus	ʊ	t	0.0247331	0.749598
	Ante_Stress	Nucleus	ʊ	.ɑː	0.024268	0.735503
	Ante_Stress	Nucleus	ʊ	.iː	0.0242276	0.734278
	Ante_Stress	Nucleus	ʊ	.a	0.0229473	0.695476
	Ante_Stress	Nucleus	ʊ	l	0.0224899	0.681611
	Ante_Stress	Nucleus	ʊ	.ʂ	0.021707	0.657883
	Ante_Stress	Nucleus	ʊ	.ʝ	0.0213696	0.647658
	Ante_Stress	Nucleus	ʊ	.ɪ	0.0210004	0.63647
	Ante_Stress	Nucleus	ʊ	.eː	0.0203808	0.61769
	Ante_Stress	Nucleus	ʊ	d	0.0201907	0.61193
	Ante_Stress	Nucleus	ʊ	.e̞	0.0190447	0.577198
	Ante_Stress	Nucleus	ʊ	ɭ	0.0174142	0.527781
	Ante_Stress	Nucleus	ʊ	n	0.0162737	0.493215
	Ante_Stress	Nucleus	ʊ	.ɔ	0.0149295	0.452475
	Ante_Stress	Nucleus	ʊ	ʂ	0.0128418	0.389203
	Ante_Stress	Nucleus	ʊ	.oː	0.011681	0.354023
	Ante_Stress	Nucleus	ʊ	.ɕ	0.0112208	0.340075
	Ante_Stress	Nucleus	ʊ	m	0.0107211	0.324929
	Ante_Stress	Nucleus	y	.r	0.0683826	1
	Ante_Stress	Nucleus	y	r	0.0674221	0.985954
	Ante_Stress	Nucleus	y	.d	0.0606641	0.887127
	Ante_Stress	Nucleus	y	.l	0.0600467	0.878099
	Ante_Stress	Nucleus	y	.n	0.0595484	0.870812
	Ante_Stress	Nucleus	y	.b	0.0588316	0.86033
	Ante_Stress	Nucleus	y	.a	0.0586776	0.858078
	Ante_Stress	Nucleus	y	d	0.0562758	0.822955
	Ante_Stress	Nucleus	y	.p	0.0526504	0.769938
	Ante_Stress	Nucleus	y	.h	0.051885	0.758746
	Ante_Stress	Nucleus	y	.m	0.0491424	0.718639
	Ante_Stress	Nucleus	y	s	0.0477855	0.698797
	Ante_Stress	Nucleus	y	k	0.0472212	0.690544
	Ante_Stress	Nucleus	y	.ɡ	0.040311	0.589492
	Ante_Stress	Nucleus	y	.f	0.0390906	0.571645
	Ante_Stress	Nucleus	y	.v	0.0360462	0.527125
	Ante_Stress	Nucleus	y	.t	0.0336072	0.491458
	Ante_Stress	Nucleus	y	.s	0.0328264	0.480039
	Ante_Stress	Nucleus	y	.k	0.026874	0.392995
	Ante_Stress	Nucleus	y	v	0.0265332	0.388011
	Ante_Stress	Nucleus	y	.ɔ	0.0261779	0.382815
	Ante_Stress	Nucleus	ʏ	.v	0.0478247	1
	Ante_Stress	Nucleus	ʏ	s	0.0439286	0.918534
	Ante_Stress	Nucleus	ʏ	m	0.0437933	0.915706
	Ante_Stress	Nucleus	ʏ	.k	0.0419005	0.876128
	Ante_Stress	Nucleus	ʏ	.a	0.0394194	0.824249
	Ante_Stress	Nucleus	ʏ	.s	0.038609	0.807304
	Ante_Stress	Nucleus	ʏ	n	0.0378289	0.790992
	Ante_Stress	Nucleus	ʏ	.ʝ	0.0370556	0.774822
	Ante_Stress	Nucleus	ʏ	.r	0.0370207	0.774092
	Ante_Stress	Nucleus	ʏ	.l	0.0367403	0.768228
	Ante_Stress	Nucleus	ʏ	.n	0.0355977	0.744338
	Ante_Stress	Nucleus	ʏ	.t	0.0352067	0.736162
	Ante_Stress	Nucleus	ʏ	p	0.0336972	0.704599
	Ante_Stress	Nucleus	ʏ	.p	0.0333939	0.698257
	Ante_Stress	Nucleus	ʏ	.m	0.033241	0.695061
	Ante_Stress	Nucleus	ʏ	.ɡ	0.0330029	0.690082
	Ante_Stress	Nucleus	ʏ	.b	0.0282495	0.590689
	Ante_Stress	Nucleus	ʏ	.eː	0.0275607	0.576286
	Ante_Stress	Nucleus	ʏ	l	0.0270125	0.564825
	Ante_Stress	Nucleus	ʏ	.ɪ	0.0268688	0.561819
	Ante_Stress	Nucleus	ʏ	k	0.0267373	0.559069
	Ante_Stress	Nucleus	ʏ	ŋ	0.0267081	0.558459
	Ante_Stress	Nucleus	ʏ	.d	0.0265712	0.555597
	Ante_Stress	Nucleus	ʏ	.ɛ̝	0.0263473	0.550914
	Ante_Stress	Nucleus	ʏ	ɡ	0.0263023	0.549973
	Ante_Stress	Nucleus	ʏ	.f	0.0250217	0.523196
	Ante_Stress	Nucleus	ʏ	.ɑː	0.0236702	0.494937
	Ante_Stress	Nucleus	ʏ	d	0.0232143	0.485404
	Ante_Stress	Nucleus	ʏ	.oː	0.02259	0.47235
	Ante_Stress	Nucleus	ʏ	t	0.0208301	0.435551
	Ante_Stress	Nucleus	ʏ	.ʊ	0.0171534	0.358672
	Ante_Stress	Nucleus	ʏ	.ʂ	0.0169022	0.353421
	Ante_Stress	Nucleus	ø	.r	0.0829661	1
	Ante_Stress	Nucleus	ø	.v	0.0825056	0.99445
	Ante_Stress	Nucleus	ø	.d	0.0683344	0.823643
	Ante_Stress	Nucleus	ø	.p	0.0667273	0.804272
	Ante_Stress	Nucleus	ø	.t	0.0660646	0.796285
	Ante_Stress	Nucleus	ø	.s	0.0590972	0.712305
	Ante_Stress	Nucleus	ø	.ɡ	0.0564171	0.680003
	Ante_Stress	Nucleus	ø	.n	0.0545264	0.657213
	Ante_Stress	Nucleus	ø	ɳ	0.0536533	0.646689
	Ante_Stress	Nucleus	ø	ʂ	0.0484419	0.583876
	Ante_Stress	Nucleus	ø	r	0.0472777	0.569844
	Ante_Stress	Nucleus	ø	.k	0.0391403	0.471763
	Ante_Stress	Nucleus	ø	n	0.0369734	0.445645
	Ante_Stress	Nucleus	ø	v	0.0355046	0.427941
	Ante_Stress	Nucleus	ø	.ʂ	0.0340159	0.409998
	Ante_Stress	Nucleus	ø	.l	0.0335176	0.403991
	Ante_Stress	Nucleus	ø	.f	0.0298648	0.359964
	Ante_Stress	Nucleus	ø	.b	0.028821	0.347383
	Ante_Stress	Nucleus	ø	s	0.0214772	0.258868
	Ante_Stress	Nucleus	ø	ɡ	0.0181253	0.218467
	Ante_Stress	Nucleus	ø	p	0.0167954	0.202437
	Ante_Stress	Nucleus	ø	ɭ	0.0117395	0.141498
	Ante_Stress	Nucleus	ø	d	0.00801346	0.0965872
	Ante_Stress	Nucleus	ø̞	r	0.0645984	1
	Ante_Stress	Nucleus	ø̞	.ʂ	0.0625503	0.968295
	Ante_Stress	Nucleus	ø̞	ʂ	0.0623415	0.965062
	Ante_Stress	Nucleus	ø̞	.r	0.061474	0.951633
	Ante_Stress	Nucleus	ø̞	ɭ	0.0565855	0.875958
	Ante_Stress	Nucleus	ø̞	.t	0.0535869	0.829539
	Ante_Stress	Nucleus	ø̞	ʈ	0.0507572	0.785734
	Ante_Stress	Nucleus	ø̞	ɖ	0.0492009	0.761642
	Ante_Stress	Nucleus	ø̞	ɳ	0.0485904	0.752192
	Ante_Stress	Nucleus	ø̞	s	0.0447652	0.692977
	Ante_Stress	Nucleus	ø̞	.b	0.0406081	0.628623
	Ante_Stress	Nucleus	ø̞	n	0.0386845	0.598846
	Ante_Stress	Nucleus	ø̞	.s	0.0373047	0.577486
	Ante_Stress	Nucleus	ø̞	v	0.0347758	0.538338
	Ante_Stress	Nucleus	ø̞	l	0.0347122	0.537353
	Ante_Stress	Nucleus	ø̞	.d	0.0342452	0.530124
	Ante_Stress	Nucleus	ø̞	m	0.0327628	0.507176
	Ante_Stress	Nucleus	ø̞	.l	0.0308739	0.477936
	Ante_Stress	Nucleus	ø̞	.ɕ	0.0263889	0.408506
	Ante_Stress	Nucleus	ø̞	.uː	0.0263309	0.407609
	Ante_Stress	Nucleus	ø̞	.v	0.0243916	0.377589
	Ante_Stress	Nucleus	ø̞	.n	0.0223492	0.345971
	Ante_Stress	Nucleus	ø̞	ɡ	0.0210178	0.32536
	Ante_Stress	Nucleus	ø̞	.iː	0.0182065	0.281841
	Ante_Stress	Nucleus	ø̞	.m	0.014328	0.221801
	Ante_Stress	Nucleus	ø̞	ʝ	0.00856963	0.13266
	Ante_Stress	Coda	b	.s	0.193313	1
	Ante_Stress	Coda	b	.v	0.162512	0.840667
	Ante_Stress	Coda	b	.d	0.161045	0.833078
	Ante_Stress	Coda	b	.t	0.146516	0.757922
	Ante_Stress	Coda	b	.n	0.134143	0.693914
	Ante_Stress	Coda	b	.m	0.109492	0.566397
	Ante_Stress	Coda	b	s	0.092979	0.480976
	Ante_Stress	Coda	d	.r	0.118098	1
	Ante_Stress	Coda	d	.m	0.11717	0.992143
	Ante_Stress	Coda	d	.n	0.110228	0.933366
	Ante_Stress	Coda	d	.v	0.106133	0.89869
	Ante_Stress	Coda	d	.t	0.104427	0.884239
	Ante_Stress	Coda	d	.s	0.0910166	0.770689
	Ante_Stress	Coda	d	.b	0.0779014	0.659636
	Ante_Stress	Coda	d	.ʝ	0.076016	0.64367
	Ante_Stress	Coda	d	s	0.0679272	0.575178
	Ante_Stress	Coda	d	.l	0.0656037	0.555504
	Ante_Stress	Coda	d	.h	0.043042	0.364461
	Ante_Stress	Coda	d	.f	0.0224376	0.189992
	Ante_Stress	Coda	ɖ	.ɛ̝	0.0762981	1
	Ante_Stress	Coda	ɖ	.eː	0.0680506	0.891904
	Ante_Stress	Coda	ɖ	.e̞	0.0676177	0.886231
	Ante_Stress	Coda	ɖ	.ɪ	0.0618677	0.810869
	Ante_Stress	Coda	ɖ	.iː	0.0614511	0.805409
	Ante_Stress	Coda	ɖ	.ɑː	0.055363	0.725615
	Ante_Stress	Coda	ɖ	.r	0.0547971	0.718198
	Ante_Stress	Coda	ɖ	.ø̞	0.0529853	0.694452
	Ante_Stress	Coda	ɖ	.oː	0.0490976	0.643498
	Ante_Stress	Coda	ɖ	.ɵ	0.0485579	0.636424
	Ante_Stress	Coda	ɖ	.v	0.0441129	0.578166
	Ante_Stress	Coda	ɖ	.ɔ	0.0425999	0.558335
	Ante_Stress	Coda	ɖ	.ɛː	0.0424851	0.55683
	Ante_Stress	Coda	ɖ	.ʊ	0.0397857	0.521452
	Ante_Stress	Coda	ɖ	.uː	0.0363381	0.476265
	Ante_Stress	Coda	ɖ	.ʉː	0.033627	0.440733
	Ante_Stress	Coda	ɖ	.yː	0.0319307	0.4185
	Ante_Stress	Coda	ɖ	ʂ	0.0313433	0.4108
	Ante_Stress	Coda	ɖ	.ɭ	0.0288929	0.378685
	Ante_Stress	Coda	ɖ	.a	0.0267707	0.350869
	Ante_Stress	Coda	ɖ	.k	0.0212918	0.279061
	Ante_Stress	Coda	ɖ	.ɳ	0.013287	0.174146
	Ante_Stress	Coda	ɖ	.ʏ	0.0114488	0.150054
	Ante_Stress	Coda	f	.t	0.244898	1
	Ante_Stress	Coda	f	.ɡ	0.179667	0.733642
	Ante_Stress	Coda	f	.ʝ	0.143909	0.587629
	Ante_Stress	Coda	f	.s	0.139572	0.569921
	Ante_Stress	Coda	f	.p	0.0885016	0.361382
	Ante_Stress	Coda	f	.b	0.082973	0.338806
	Ante_Stress	Coda	f	s	0.0805163	0.328775
	Ante_Stress	Coda	f	.n	0.0399625	0.16318
	Ante_Stress	Coda	ɡ	.r	0.182332	1
	Ante_Stress	Coda	ɡ	.n	0.147188	0.807254
	Ante_Stress	Coda	ɡ	.l	0.1301	0.713534
	Ante_Stress	Coda	ɡ	.m	0.128493	0.70472
	Ante_Stress	Coda	ɡ	.d	0.116856	0.640897
	Ante_Stress	Coda	ɡ	.h	0.0738946	0.405276
	Ante_Stress	Coda	ɡ	.s	0.0577699	0.31684
	Ante_Stress	Coda	ɡ	s	0.0516339	0.283187
	Ante_Stress	Coda	ɡ	.b	0.0492076	0.26988
	Ante_Stress	Coda	ɡ	.f	0.0463027	0.253948
	Ante_Stress	Coda	ɡ	.ʝ	0.0162235	0.088978
	Ante_Stress	Coda	ɧ	.m	1	1
	Ante_Stress	Coda	ʝ	.k	0.106545	1
	Ante_Stress	Coda	ʝ	.l	0.0863809	0.810748
	Ante_Stress	Coda	ʝ	.t	0.0839302	0.787747
	Ante_Stress	Coda	ʝ	.v	0.0807871	0.758246
	Ante_Stress	Coda	ʝ	.d	0.0800441	0.751273
	Ante_Stress	Coda	ʝ	.f	0.0782478	0.734413
	Ante_Stress	Coda	ʝ	.m	0.070456	0.661282
	Ante_Stress	Coda	ʝ	.p	0.0684296	0.642263
	Ante_Stress	Coda	ʝ	.s	0.0681043	0.639209
	Ante_Stress	Coda	ʝ	.ɡ	0.0668879	0.627792
	Ante_Stress	Coda	ʝ	.r	0.0619939	0.581858
	Ante_Stress	Coda	ʝ	.b	0.0562637	0.528077
	Ante_Stress	Coda	ʝ	n	0.0499904	0.469197
	Ante_Stress	Coda	ʝ	k	0.0419397	0.393635
	Ante_Stress	Coda	k	.s	0.10924	1
	Ante_Stress	Coda	k	t	0.107755	0.986408
	Ante_Stress	Coda	k	.v	0.104811	0.959455
	Ante_Stress	Coda	k	.ɧ	0.0997126	0.912785
	Ante_Stress	Coda	k	.r	0.0937921	0.858588
	Ante_Stress	Coda	k	.n	0.0841724	0.770527
	Ante_Stress	Coda	k	s	0.083837	0.767457
	Ante_Stress	Coda	k	.t	0.0712172	0.651934
	Ante_Stress	Coda	k	.d	0.0662086	0.606084
	Ante_Stress	Coda	k	.h	0.0554154	0.507281
	Ante_Stress	Coda	k	.b	0.0443876	0.406331
	Ante_Stress	Coda	k	.m	0.0404303	0.370105
	Ante_Stress	Coda	k	.f	0.0390205	0.3572
	Ante_Stress	Coda	l	.b	0.0661399	1
	Ante_Stress	Coda	l	.t	0.065361	0.988222
	Ante_Stress	Coda	l	.s	0.0652769	0.986952
	Ante_Stress	Coda	l	.ʝ	0.0645796	0.976409
	Ante_Stress	Coda	l	.k	0.0567771	0.858439
	Ante_Stress	Coda	l	.v	0.0550626	0.832517
	Ante_Stress	Coda	l	.d	0.0505525	0.764327
	Ante_Stress	Coda	l	.ɡ	0.0497534	0.752244
	Ante_Stress	Coda	l	.r	0.0492008	0.74389
	Ante_Stress	Coda	l	t	0.0477202	0.721504
	Ante_Stress	Coda	l	.p	0.0475856	0.719469
	Ante_Stress	Coda	l	.m	0.0467517	0.706861
	Ante_Stress	Coda	l	.h	0.0462045	0.698587
	Ante_Stress	Coda	l	.f	0.0461489	0.697747
	Ante_Stress	Coda	l	.ɧ	0.0406326	0.614343
	Ante_Stress	Coda	l	.ɕ	0.0389818	0.589384
	Ante_Stress	Coda	l	d	0.0362398	0.547927
	Ante_Stress	Coda	l	m	0.0326775	0.494066
	Ante_Stress	Coda	l	v	0.0310648	0.469682
	Ante_Stress	Coda	l	s	0.0258324	0.390572
	Ante_Stress	Coda	l	f	0.0226947	0.343131
	Ante_Stress	Coda	l	p	0.0147614	0.223184
	Ante_Stress	Coda	ɭ	.uː	0.0537661	1
	Ante_Stress	Coda	ɭ	.ɪ	0.0527423	0.980958
	Ante_Stress	Coda	ɭ	.ɔ	0.0527411	0.980936
	Ante_Stress	Coda	ɭ	.oː	0.0521977	0.970829
	Ante_Stress	Coda	ɭ	.ɑː	0.0487757	0.907182
	Ante_Stress	Coda	ɭ	.iː	0.0482251	0.896941
	Ante_Stress	Coda	ɭ	.ɛ̝	0.047804	0.889109
	Ante_Stress	Coda	ɭ	.ɵ	0.0474856	0.883188
	Ante_Stress	Coda	ɭ	.a	0.0449149	0.835376
	Ante_Stress	Coda	ɭ	.s	0.0431683	0.802889
	Ante_Stress	Coda	ɭ	.eː	0.042876	0.797453
	Ante_Stress	Coda	ɭ	.øː	0.035673	0.663484
	Ante_Stress	Coda	ɭ	.b	0.0344798	0.641291
	Ante_Stress	Coda	ɭ	.ʉ̞	0.0338884	0.630292
	Ante_Stress	Coda	ɭ	.ʝ	0.0329516	0.61287
	Ante_Stress	Coda	ɭ	.ø̞	0.0324785	0.604069
	Ante_Stress	Coda	ɭ	.ɛː	0.0318285	0.591979
	Ante_Stress	Coda	ɭ	.h	0.0282722	0.525837
	Ante_Stress	Coda	ɭ	.ɡ	0.0267567	0.497649
	Ante_Stress	Coda	ɭ	.ʂ	0.0255342	0.474913
	Ante_Stress	Coda	ɭ	.p	0.0245812	0.457188
	Ante_Stress	Coda	ɭ	.ʈ	0.023918	0.444852
	Ante_Stress	Coda	ɭ	.m	0.0211579	0.393517
	Ante_Stress	Coda	ɭ	.ʉː	0.0199539	0.371124
	Ante_Stress	Coda	ɭ	.ʊ	0.0192238	0.357544
	Ante_Stress	Coda	ɭ	.f	0.0175021	0.325523
	Ante_Stress	Coda	ɭ	s	0.017005	0.316276
	Ante_Stress	Coda	ɭ	.e̞	0.0164535	0.30602
	Ante_Stress	Coda	ɭ	.r	0.0125489	0.233397
	Ante_Stress	Coda	ɭ	.ʏ	0.0110961	0.206376
	Ante_Stress	Coda	m	.p	0.0811059	1
	Ante_Stress	Coda	m	.b	0.0754209	0.929907
	Ante_Stress	Coda	m	.k	0.073247	0.903103
	Ante_Stress	Coda	m	.f	0.0691648	0.852771
	Ante_Stress	Coda	m	.d	0.0672648	0.829345
	Ante_Stress	Coda	m	.n	0.0669147	0.825029
	Ante_Stress	Coda	m	.t	0.061073	0.753003
	Ante_Stress	Coda	m	.r	0.0594899	0.733484
	Ante_Stress	Coda	m	.h	0.0582092	0.717693
	Ante_Stress	Coda	m	.ɧ	0.0546322	0.673591
	Ante_Stress	Coda	m	.ɡ	0.052937	0.65269
	Ante_Stress	Coda	m	.v	0.04989	0.615122
	Ante_Stress	Coda	m	.s	0.0493562	0.60854
	Ante_Stress	Coda	m	s	0.0474622	0.585188
	Ante_Stress	Coda	m	.l	0.0432371	0.533094
	Ante_Stress	Coda	m	.ʝ	0.0328219	0.404679
	Ante_Stress	Coda	m	b	0.0290215	0.357822
	Ante_Stress	Coda	m	n	0.0287516	0.354495
	Ante_Stress	Coda	ɱ	.f	0.538318	1
	Ante_Stress	Coda	ɱ	.v	0.461682	0.857637
	Ante_Stress	Coda	n	.t	0.111642	1
	Ante_Stress	Coda	n	.d	0.105081	0.941228
	Ante_Stress	Coda	n	.s	0.099778	0.89373
	Ante_Stress	Coda	n	s	0.0926645	0.830012
	Ante_Stress	Coda	n	.ʝ	0.0921025	0.824979
	Ante_Stress	Coda	n	.ɧ	0.081179	0.727135
	Ante_Stress	Coda	n	.h	0.0746265	0.668443
	Ante_Stress	Coda	n	.l	0.0729321	0.653266
	Ante_Stress	Coda	n	t	0.0718278	0.643375
	Ante_Stress	Coda	n	.ɕ	0.0691095	0.619026
	Ante_Stress	Coda	n	d	0.0670291	0.600391
	Ante_Stress	Coda	n	.r	0.0620279	0.555595
	Ante_Stress	Coda	ɳ	.a	0.0775814	1
	Ante_Stress	Coda	ɳ	.eː	0.0688412	0.887341
	Ante_Stress	Coda	ɳ	.ɪ	0.0634445	0.81778
	Ante_Stress	Coda	ɳ	.yː	0.0611059	0.787636
	Ante_Stress	Coda	ɳ	.ɵ	0.0579791	0.747332
	Ante_Stress	Coda	ɳ	.ɑː	0.0569691	0.734313
	Ante_Stress	Coda	ɳ	.ø̞	0.0542969	0.699869
	Ante_Stress	Coda	ɳ	.ɛː	0.0499237	0.643501
	Ante_Stress	Coda	ɳ	.ɛ̝	0.0481403	0.620513
	Ante_Stress	Coda	ɳ	.ʂ	0.0478909	0.617298
	Ante_Stress	Coda	ɳ	.øː	0.0474206	0.611236
	Ante_Stress	Coda	ɳ	.e̞	0.0457281	0.589421
	Ante_Stress	Coda	ɳ	.ɧ	0.0456982	0.589035
	Ante_Stress	Coda	ɳ	.ʊ	0.0439736	0.566806
	Ante_Stress	Coda	ɳ	ʂ	0.0426152	0.549296
	Ante_Stress	Coda	ɳ	.r	0.0419162	0.540287
	Ante_Stress	Coda	ɳ	.oː	0.0406459	0.523913
	Ante_Stress	Coda	ɳ	ʈ	0.0377762	0.486923
	Ante_Stress	Coda	ɳ	.iː	0.0275191	0.354713
	Ante_Stress	Coda	ɳ	.h	0.0265573	0.342315
	Ante_Stress	Coda	ɳ	.uː	0.0139765	0.180152
	Ante_Stress	Coda	ŋ	.ɡ	0.0722252	1
	Ante_Stress	Coda	ŋ	.e̞	0.0687491	0.951872
	Ante_Stress	Coda	ŋ	.k	0.0661606	0.916033
	Ante_Stress	Coda	ŋ	k	0.0631786	0.874745
	Ante_Stress	Coda	ŋ	.ɧ	0.0630771	0.87334
	Ante_Stress	Coda	ŋ	.n	0.0607002	0.840431
	Ante_Stress	Coda	ŋ	.b	0.0600148	0.83094
	Ante_Stress	Coda	ŋ	.t	0.051642	0.715014
	Ante_Stress	Coda	ŋ	.s	0.0498827	0.690655
	Ante_Stress	Coda	ŋ	.f	0.0471569	0.652915
	Ante_Stress	Coda	ŋ	.h	0.0467946	0.6479
	Ante_Stress	Coda	ŋ	.ʝ	0.0459107	0.635661
	Ante_Stress	Coda	ŋ	.v	0.0458019	0.634154
	Ante_Stress	Coda	ŋ	.l	0.0451603	0.625272
	Ante_Stress	Coda	ŋ	s	0.042315	0.585876
	Ante_Stress	Coda	ŋ	.øː	0.0391377	0.541885
	Ante_Stress	Coda	ŋ	.d	0.0334365	0.462948
	Ante_Stress	Coda	ŋ	.ʂ	0.0205278	0.284219
	Ante_Stress	Coda	ŋ	.ɪ	0.0191147	0.264654
	Ante_Stress	Coda	ŋ	t	0.0182626	0.252857
	Ante_Stress	Coda	ŋ	.r	0.0182626	0.252857
	Ante_Stress	Coda	ŋ	.a	0.0126767	0.175517
	Ante_Stress	Coda	ŋ	.eː	0.00981149	0.135846
	Ante_Stress	Coda	p	.s	0.209831	1
	Ante_Stress	Coda	p	.t	0.207317	0.988016
	Ante_Stress	Coda	p	.ɧ	0.164708	0.784957
	Ante_Stress	Coda	p	.n	0.127268	0.606525
	Ante_Stress	Coda	p	.d	0.10355	0.493494
	Ante_Stress	Coda	p	s	0.0957653	0.456392
	Ante_Stress	Coda	p	.h	0.0915601	0.436351
	Ante_Stress	Coda	r	.f	0.0716242	1
	Ante_Stress	Coda	r	.m	0.0708829	0.98965
	Ante_Stress	Coda	r	.v	0.0704739	0.983939
	Ante_Stress	Coda	r	.b	0.0687473	0.959833
	Ante_Stress	Coda	r	.k	0.0676671	0.944751
	Ante_Stress	Coda	r	.h	0.06682	0.932925
	Ante_Stress	Coda	r	.ɡ	0.0648575	0.905525
	Ante_Stress	Coda	r	.ɧ	0.0644566	0.899928
	Ante_Stress	Coda	r	.ɕ	0.0631873	0.882205
	Ante_Stress	Coda	r	v	0.0603786	0.842991
	Ante_Stress	Coda	r	.p	0.0568957	0.794364
	Ante_Stress	Coda	r	.ʝ	0.0539201	0.752819
	Ante_Stress	Coda	r	k	0.0399445	0.557695
	Ante_Stress	Coda	r	.d	0.038621	0.539218
	Ante_Stress	Coda	r	m	0.0361146	0.504223
	Ante_Stress	Coda	r	ʝ	0.0337678	0.471458
	Ante_Stress	Coda	r	.s	0.0255201	0.356305
	Ante_Stress	Coda	r	p	0.0253944	0.35455
	Ante_Stress	Coda	r	.ɖ	0.0207265	0.289379
	Ante_Stress	Coda	s	.t	0.0940067	1
	Ante_Stress	Coda	s	.k	0.0833219	0.88634
	Ante_Stress	Coda	s	.p	0.08225	0.874938
	Ante_Stress	Coda	s	.l	0.0792641	0.843175
	Ante_Stress	Coda	s	.v	0.0742852	0.790211
	Ante_Stress	Coda	s	.r	0.0735973	0.782894
	Ante_Stress	Coda	s	.f	0.0617963	0.65736
	Ante_Stress	Coda	s	.m	0.0608342	0.647126
	Ante_Stress	Coda	s	.b	0.0588017	0.625505
	Ante_Stress	Coda	s	.h	0.0553402	0.588684
	Ante_Stress	Coda	s	.d	0.0536846	0.571072
	Ante_Stress	Coda	s	t	0.0466496	0.496237
	Ante_Stress	Coda	s	.ɕ	0.0443183	0.471438
	Ante_Stress	Coda	s	.n	0.0415947	0.442465
	Ante_Stress	Coda	s	.ʝ	0.0415947	0.442465
	Ante_Stress	Coda	s	.ɡ	0.0308072	0.327712
	Ante_Stress	Coda	s	k	0.0178533	0.189916
	Ante_Stress	Coda	ʂ	ʈ	0.148128	1
	Ante_Stress	Coda	ʂ	.v	0.134188	0.90589
	Ante_Stress	Coda	ʂ	.p	0.110007	0.742649
	Ante_Stress	Coda	ʂ	.k	0.0986579	0.666029
	Ante_Stress	Coda	ʂ	.h	0.0959697	0.647882
	Ante_Stress	Coda	ʂ	.m	0.0876881	0.591973
	Ante_Stress	Coda	ʂ	.b	0.0813443	0.549147
	Ante_Stress	Coda	ʂ	.r	0.0665933	0.449564
	Ante_Stress	Coda	ʂ	.ʝ	0.0636828	0.429916
	Ante_Stress	Coda	ʂ	.ɡ	0.0585886	0.395525
	Ante_Stress	Coda	ʂ	.f	0.0551513	0.372321
	Ante_Stress	Coda	t	.iː	0.0415779	1
	Ante_Stress	Coda	t	.r	0.0408585	0.982697
	Ante_Stress	Coda	t	.ɧ	0.0406791	0.978383
	Ante_Stress	Coda	t	.uː	0.0396661	0.954019
	Ante_Stress	Coda	t	.s	0.0394918	0.949827
	Ante_Stress	Coda	t	.m	0.0381842	0.918378
	Ante_Stress	Coda	t	.v	0.0377425	0.907753
	Ante_Stress	Coda	t	.ɪ	0.0373282	0.89779
	Ante_Stress	Coda	t	.eː	0.0359328	0.864229
	Ante_Stress	Coda	t	.ʉ	0.0359324	0.864218
	Ante_Stress	Coda	t	.ɛː	0.0338526	0.814197
	Ante_Stress	Coda	t	.øː	0.0337342	0.81135
	Ante_Stress	Coda	t	.ʉː	0.0335668	0.807323
	Ante_Stress	Coda	t	.a	0.0326016	0.784107
	Ante_Stress	Coda	t	.l	0.0320554	0.770972
	Ante_Stress	Coda	t	.ɑː	0.0304597	0.732593
	Ante_Stress	Coda	t	.n	0.0300864	0.723614
	Ante_Stress	Coda	t	.ʊ	0.029519	0.709969
	Ante_Stress	Coda	t	.ʉ̞	0.0284926	0.685282
	Ante_Stress	Coda	t	.e̞	0.027904	0.671125
	Ante_Stress	Coda	t	.ɕ	0.0277448	0.667295
	Ante_Stress	Coda	t	.oː	0.0264326	0.635736
	Ante_Stress	Coda	t	.ʝ	0.0262917	0.632349
	Ante_Stress	Coda	t	.h	0.0248712	0.598182
	Ante_Stress	Coda	t	.ɛ̝	0.0234681	0.564436
	Ante_Stress	Coda	t	.f	0.0233163	0.560785
	Ante_Stress	Coda	t	.ɡ	0.0213536	0.51358
	Ante_Stress	Coda	t	s	0.0200608	0.482486
	Ante_Stress	Coda	t	.yː	0.0200349	0.481865
	Ante_Stress	Coda	t	.p	0.0169251	0.407069
	Ante_Stress	Coda	t	.ʏ	0.0136567	0.32846
	Ante_Stress	Coda	t	.b	0.0132462	0.318589
	Ante_Stress	Coda	t	.ɔ	0.0128801	0.309782
	Ante_Stress	Coda	t	.ɑ	0.0105028	0.252604
	Ante_Stress	Coda	t	.d	0.00988978	0.237861
	Ante_Stress	Coda	t	.e	0.00965957	0.232325
	Ante_Stress	Coda	ʈ	.oː	0.050912	1
	Ante_Stress	Coda	ʈ	.ɪ	0.0484235	0.95112
	Ante_Stress	Coda	ʈ	.ɔ	0.0477325	0.937549
	Ante_Stress	Coda	ʈ	.iː	0.0473353	0.929746
	Ante_Stress	Coda	ʈ	.eː	0.04469	0.877789
	Ante_Stress	Coda	ʈ	.r	0.0430062	0.844715
	Ante_Stress	Coda	ʈ	.øː	0.0425515	0.835785
	Ante_Stress	Coda	ʈ	.ɛ̝	0.0419343	0.823662
	Ante_Stress	Coda	ʈ	.uː	0.0414574	0.814294
	Ante_Stress	Coda	ʈ	.ɧ	0.0406934	0.799288
	Ante_Stress	Coda	ʈ	.ɑː	0.0406335	0.798111
	Ante_Stress	Coda	ʈ	.yː	0.0370708	0.728134
	Ante_Stress	Coda	ʈ	.v	0.0355468	0.6982
	Ante_Stress	Coda	ʈ	.ʉ	0.0335669	0.659312
	Ante_Stress	Coda	ʈ	.ʊ	0.0327386	0.643041
	Ante_Stress	Coda	ʈ	.a	0.0316625	0.621905
	Ante_Stress	Coda	ʈ	.ɛː	0.0307224	0.603441
	Ante_Stress	Coda	ʈ	.e̞	0.0302895	0.594938
	Ante_Stress	Coda	ʈ	.f	0.0289784	0.569185
	Ante_Stress	Coda	ʈ	.ɵ	0.0279578	0.549139
	Ante_Stress	Coda	ʈ	ʂ	0.027948	0.548947
	Ante_Stress	Coda	ʈ	.ʂ	0.0272399	0.535038
	Ante_Stress	Coda	ʈ	.ʉː	0.0256281	0.503379
	Ante_Stress	Coda	ʈ	.o	0.022471	0.44137
	Ante_Stress	Coda	ʈ	.h	0.0215506	0.42329
	Ante_Stress	Coda	ʈ	.ø̞	0.0197771	0.388455
	Ante_Stress	Coda	ʈ	.m	0.0184657	0.362698
	Ante_Stress	Coda	ʈ	.ʏ	0.0152924	0.300369
	Ante_Stress	Coda	ʈ	.ɕ	0.0149692	0.294021
	Ante_Stress	Coda	ʈ	.a͡u	0.0126212	0.247902
	Ante_Stress	Coda	ʈ	.b	0.00806685	0.158447
	Ante_Stress	Coda	ʈ	.ɭ	0.00806685	0.158447
	Ante_Stress	Coda	v	.ʝ	0.171948	1
	Ante_Stress	Coda	v	.l	0.123292	0.717028
	Ante_Stress	Coda	v	.r	0.122139	0.710325
	Ante_Stress	Coda	v	.d	0.104867	0.609875
	Ante_Stress	Coda	v	s	0.0918804	0.534349
	Ante_Stress	Coda	v	.f	0.0808276	0.47007
	Ante_Stress	Coda	v	.k	0.0800044	0.465282
	Ante_Stress	Coda	v	.s	0.0784529	0.456259
	Ante_Stress	Coda	v	.m	0.0596	0.346616
	Ante_Stress	Coda	v	.t	0.0584183	0.339744
	Ante_Stress	Coda	v	.ɧ	0.028571	0.166161
	Stressed	Onset	*	s	0.0314438	1
	Stressed	Onset	*	m	0.0308736	0.981865
	Stressed	Onset	*	d	0.0308577	0.981359
	Stressed	Onset	*	h	0.0304613	0.968754
	Stressed	Onset	*	ʝ	0.0302249	0.961235
	Stressed	Onset	*	v	0.0301922	0.960196
	Stressed	Onset	*	f	0.0300147	0.954549
	Stressed	Onset	*	ɔ	0.0298764	0.950152
	Stressed	Onset	*	a	0.0297507	0.946153
	Stressed	Onset	*	t	0.0295969	0.941263
	Stressed	Onset	*	ɛ̝	0.0294074	0.935236
	Stressed	Onset	*	b	0.0293588	0.933692
	Stressed	Onset	*	k	0.0293354	0.932948
	Stressed	Onset	*	p	0.0291392	0.926708
	Stressed	Onset	*	n	0.0291122	0.925847
	Stressed	Onset	*	l	0.0289461	0.920565
	Stressed	Onset	*	ɛː	0.0285723	0.908677
	Stressed	Onset	*	ɪ	0.0284908	0.906084
	Stressed	Onset	*	eː	0.0284745	0.905567
	Stressed	Onset	*	iː	0.0283592	0.901899
	Stressed	Onset	*	ɡ	0.0277349	0.882047
	Stressed	Onset	*	r	0.0275212	0.875248
	Stressed	Onset	*	ɑː	0.0269593	0.857381
	Stressed	Onset	*	ɕ	0.0269459	0.856954
	Stressed	Onset	*	ɧ	0.0267444	0.850547
	Stressed	Onset	*	ɵ	0.0266803	0.848507
	Stressed	Onset	*	ʉː	0.0265033	0.842878
	Stressed	Onset	*	oː	0.0260737	0.829214
	Stressed	Onset	*	uː	0.0255806	0.813532
	Stressed	Onset	*	øː	0.0251808	0.80082
	Stressed	Onset	*	ø̞	0.022545	0.716992
	Stressed	Onset	*	ʊ	0.0223269	0.710058
	Stressed	Onset	*	ʏ	0.0212137	0.674654
	Stressed	Onset	*	ʂ	0.0202573	0.644239
	Stressed	Onset	*	yː	0.0189612	0.603017
	Stressed	Onset	*	a͡uː	0.0168039	0.534411
	Stressed	Onset	*	e͡ʉː	0.0157874	0.502084
	Stressed	Onset	*	ʈ	0.00369195	0.117414
	Stressed	Onset	b	l	0.056844	1
	Stressed	Onset	b	ɑː	0.05539	0.974421
	Stressed	Onset	b	r	0.0543908	0.956844
	Stressed	Onset	b	ɛ̝	0.0515713	0.907242
	Stressed	Onset	b	ɪ	0.0512835	0.902179
	Stressed	Onset	b	ø̞	0.0507519	0.892828
	Stressed	Onset	b	uː	0.050672	0.891422
	Stressed	Onset	b	ɔ	0.0501522	0.882277
	Stressed	Onset	b	iː	0.0494432	0.869804
	Stressed	Onset	b	a	0.0487042	0.856805
	Stressed	Onset	b	oː	0.0479559	0.843639
	Stressed	Onset	b	eː	0.0472276	0.830828
	Stressed	Onset	b	ɵ	0.0465762	0.819368
	Stressed	Onset	b	ɛː	0.0463891	0.816077
	Stressed	Onset	b	ʝ	0.0460728	0.810513
	Stressed	Onset	b	ʏ	0.0457865	0.805476
	Stressed	Onset	b	yː	0.0439112	0.772486
	Stressed	Onset	b	ʉː	0.0434509	0.764388
	Stressed	Onset	b	øː	0.0427156	0.751453
	Stressed	Onset	b	ʊ	0.0424867	0.747427
	Stressed	Onset	b	a͡uː	0.0282243	0.496521
	Stressed	Onset	ɕ	ɛ̝	0.0764683	1
	Stressed	Onset	ɕ	øː	0.0734873	0.961017
	Stressed	Onset	ɕ	ø̞	0.0695215	0.909155
	Stressed	Onset	ɕ	ɛː	0.0677996	0.886636
	Stressed	Onset	ɕ	iː	0.0658818	0.861556
	Stressed	Onset	ɕ	a	0.0618142	0.808363
	Stressed	Onset	ɕ	ʏ	0.0611912	0.800216
	Stressed	Onset	ɕ	yː	0.0604601	0.790656
	Stressed	Onset	ɕ	ɪ	0.0593049	0.775548
	Stressed	Onset	ɕ	ʉː	0.0576457	0.753851
	Stressed	Onset	ɕ	ɔ	0.0573972	0.750601
	Stressed	Onset	ɕ	ɑː	0.056657	0.740921
	Stressed	Onset	ɕ	eː	0.0548605	0.717428
	Stressed	Onset	ɕ	uː	0.0543475	0.710719
	Stressed	Onset	ɕ	a͡uː	0.0476012	0.622495
	Stressed	Onset	ɕ	oː	0.0433801	0.567295
	Stressed	Onset	ɕ	ʊ	0.0321819	0.420852
	Stressed	Onset	d	ɛː	0.0600004	1
	Stressed	Onset	d	ɛ̝	0.0577875	0.963119
	Stressed	Onset	d	ɑː	0.0559095	0.931819
	Stressed	Onset	d	eː	0.0554329	0.923876
	Stressed	Onset	d	oː	0.0541044	0.901734
	Stressed	Onset	d	yː	0.0523437	0.872389
	Stressed	Onset	d	ʉː	0.0522732	0.871214
	Stressed	Onset	d	ɔ	0.0521672	0.869448
	Stressed	Onset	d	r	0.0504043	0.840065
	Stressed	Onset	d	a	0.0501963	0.8366
	Stressed	Onset	d	ʊ	0.049655	0.827578
	Stressed	Onset	d	iː	0.0485456	0.809087
	Stressed	Onset	d	ɪ	0.0472689	0.787809
	Stressed	Onset	d	ɵ	0.0470574	0.784284
	Stressed	Onset	d	øː	0.0443003	0.738333
	Stressed	Onset	d	ø̞	0.0438594	0.730985
	Stressed	Onset	d	uː	0.0430881	0.71813
	Stressed	Onset	d	ʏ	0.0390625	0.651037
	Stressed	Onset	d	v	0.0292217	0.487024
	Stressed	Onset	d	ʝ	0.028266	0.471097
	Stressed	Onset	d	a͡uː	0.0272503	0.454169
	Stressed	Onset	d	n	0.0118054	0.196755
	Stressed	Onset	ɖ	ɑː	0.140161	1
	Stressed	Onset	ɖ	ɔ	0.118549	0.845807
	Stressed	Onset	ɖ	r	0.112024	0.799254
	Stressed	Onset	ɖ	eː	0.107789	0.769035
	Stressed	Onset	ɖ	a	0.0949371	0.677345
	Stressed	Onset	ɖ	øː	0.0938231	0.669396
	Stressed	Onset	ɖ	ø̞	0.0935645	0.667551
	Stressed	Onset	ɖ	ʉː	0.0846462	0.603923
	Stressed	Onset	ɖ	oː	0.0773141	0.55161
	Stressed	Onset	ɖ	yː	0.0771926	0.550743
	Stressed	Onset	f	øː	0.0553208	1
	Stressed	Onset	f	r	0.0536982	0.970668
	Stressed	Onset	f	ɪ	0.0521972	0.943537
	Stressed	Onset	f	oː	0.0515775	0.932334
	Stressed	Onset	f	a	0.0510117	0.922106
	Stressed	Onset	f	ø̞	0.049466	0.894165
	Stressed	Onset	f	ɛ̝	0.0494288	0.893494
	Stressed	Onset	f	iː	0.0491098	0.887726
	Stressed	Onset	f	l	0.0489425	0.884703
	Stressed	Onset	f	ɔ	0.0489232	0.884353
	Stressed	Onset	f	ʊ	0.0473237	0.855442
	Stressed	Onset	f	ɑː	0.0470236	0.850015
	Stressed	Onset	f	ɵ	0.0455762	0.823852
	Stressed	Onset	f	eː	0.0450108	0.813632
	Stressed	Onset	f	uː	0.0443095	0.800955
	Stressed	Onset	f	ɛː	0.0441329	0.797763
	Stressed	Onset	f	ʏ	0.0433511	0.783631
	Stressed	Onset	f	yː	0.0429356	0.77612
	Stressed	Onset	f	ʝ	0.0386857	0.699297
	Stressed	Onset	f	ʉː	0.0381593	0.689782
	Stressed	Onset	f	n	0.0328335	0.593511
	Stressed	Onset	f	a͡uː	0.0209825	0.379288
	Stressed	Onset	ɡ	oː	0.0665096	1
	Stressed	Onset	ɡ	ɔ	0.065738	0.988399
	Stressed	Onset	ɡ	r	0.0654763	0.984465
	Stressed	Onset	ɡ	l	0.0618419	0.929819
	Stressed	Onset	ɡ	a	0.0609073	0.915768
	Stressed	Onset	ɡ	uː	0.0602211	0.90545
	Stressed	Onset	ɡ	ɑː	0.0587726	0.883671
	Stressed	Onset	ɡ	ɵ	0.0574569	0.863889
	Stressed	Onset	ɡ	eː	0.0564549	0.848823
	Stressed	Onset	ɡ	ʉː	0.0551868	0.829757
	Stressed	Onset	ɡ	ɛ̝	0.0501174	0.753536
	Stressed	Onset	ɡ	n	0.0494744	0.743868
	Stressed	Onset	ɡ	iː	0.0493083	0.741371
	Stressed	Onset	ɡ	ɪ	0.0428496	0.644262
	Stressed	Onset	ɡ	ʊ	0.0410662	0.617448
	Stressed	Onset	ɡ	ɛː	0.0328376	0.493727
	Stressed	Onset	ɡ	ʏ	0.0320811	0.482352
	Stressed	Onset	ɡ	øː	0.0286531	0.430811
	Stressed	Onset	ɡ	yː	0.0230327	0.346307
	Stressed	Onset	ɡ	a͡uː	0.0215376	0.323827
	Stressed	Onset	ɡ	ø̞	0.0204767	0.307876
	Stressed	Onset	h	ɑː	0.0665356	1
	Stressed	Onset	h	a	0.0638404	0.959493
	Stressed	Onset	h	ɛ̝	0.0632806	0.951079
	Stressed	Onset	h	eː	0.0614357	0.923351
	Stressed	Onset	h	ɛː	0.0607063	0.912389
	Stressed	Onset	h	uː	0.060037	0.90233
	Stressed	Onset	h	ɔ	0.0598457	0.899455
	Stressed	Onset	h	ʉː	0.0594823	0.893993
	Stressed	Onset	h	ʊ	0.0593009	0.891267
	Stressed	Onset	h	øː	0.0578137	0.868914
	Stressed	Onset	h	ɪ	0.0567476	0.852892
	Stressed	Onset	h	oː	0.0548861	0.824914
	Stressed	Onset	h	ø̞	0.0531159	0.798309
	Stressed	Onset	h	ɵ	0.0529698	0.796113
	Stressed	Onset	h	iː	0.0486502	0.731191
	Stressed	Onset	h	ʏ	0.0463341	0.696381
	Stressed	Onset	h	yː	0.0453567	0.681692
	Stressed	Onset	h	a͡uː	0.0296613	0.445797
	Stressed	Onset	ɧ	ɛ̝	0.068648	1
	Stressed	Onset	ɧ	uː	0.0682083	0.993594
	Stressed	Onset	ɧ	ʏ	0.0666906	0.971487
	Stressed	Onset	ɧ	ʉː	0.0647952	0.943875
	Stressed	Onset	ɧ	øː	0.0644571	0.938951
	Stressed	Onset	ɧ	iː	0.0639193	0.931116
	Stressed	Onset	ɧ	ɪ	0.0637503	0.928655
	Stressed	Onset	ɧ	eː	0.0623787	0.908675
	Stressed	Onset	ɧ	ɔ	0.0584599	0.851589
	Stressed	Onset	ɧ	ɛː	0.0584521	0.851475
	Stressed	Onset	ɧ	ɵ	0.0568761	0.828518
	Stressed	Onset	ɧ	ø̞	0.0550695	0.802201
	Stressed	Onset	ɧ	a	0.0532121	0.775144
	Stressed	Onset	ɧ	yː	0.0509425	0.742083
	Stressed	Onset	ɧ	oː	0.0501399	0.730391
	Stressed	Onset	ɧ	ʊ	0.0496183	0.722794
	Stressed	Onset	ɧ	ɑː	0.0443822	0.646518
	Stressed	Onset	ʝ	ɑː	0.0722203	1
	Stressed	Onset	ʝ	ʉː	0.0644039	0.891769
	Stressed	Onset	ʝ	ɛ̝	0.0638087	0.883528
	Stressed	Onset	ʝ	ɵ	0.0632633	0.875976
	Stressed	Onset	ʝ	øː	0.0628399	0.870113
	Stressed	Onset	ʝ	ɪ	0.0606517	0.839814
	Stressed	Onset	ʝ	eː	0.0599405	0.829967
	Stressed	Onset	ʝ	uː	0.0598429	0.828615
	Stressed	Onset	ʝ	ɔ	0.0596588	0.826067
	Stressed	Onset	ʝ	ɛː	0.0587259	0.813149
	Stressed	Onset	ʝ	iː	0.0555897	0.769723
	Stressed	Onset	ʝ	ʊ	0.0555694	0.769442
	Stressed	Onset	ʝ	a	0.0524928	0.726842
	Stressed	Onset	ʝ	ø̞	0.0515574	0.71389
	Stressed	Onset	ʝ	ʏ	0.0508178	0.703649
	Stressed	Onset	ʝ	oː	0.044277	0.613082
	Stressed	Onset	ʝ	a͡uː	0.0348457	0.482492
	Stressed	Onset	ʝ	yː	0.0294944	0.408394
	Stressed	Onset	k	ɑː	0.0560812	1
	Stressed	Onset	k	ɔ	0.054738	0.976049
	Stressed	Onset	k	a	0.0547058	0.975475
	Stressed	Onset	k	r	0.0530124	0.94528
	Stressed	Onset	k	l	0.0528573	0.942514
	Stressed	Onset	k	ɵ	0.0524565	0.935368
	Stressed	Onset	k	v	0.0501205	0.893713
	Stressed	Onset	k	uː	0.0485763	0.866178
	Stressed	Onset	k	ʉː	0.0463284	0.826095
	Stressed	Onset	k	n	0.0460832	0.821723
	Stressed	Onset	k	oː	0.0452995	0.807749
	Stressed	Onset	k	ɪ	0.0450092	0.802573
	Stressed	Onset	k	ʊ	0.0448332	0.799433
	Stressed	Onset	k	ɛ̝	0.044526	0.793956
	Stressed	Onset	k	eː	0.0434911	0.775503
	Stressed	Onset	k	øː	0.0426425	0.760371
	Stressed	Onset	k	iː	0.0394815	0.704006
	Stressed	Onset	k	ɛː	0.033863	0.603821
	Stressed	Onset	k	yː	0.0321453	0.573192
	Stressed	Onset	k	a͡uː	0.0318901	0.568642
	Stressed	Onset	k	ø̞	0.0292318	0.521242
	Stressed	Onset	k	m	0.0186168	0.331962
	Stressed	Onset	k	ʏ	0.0185108	0.330072
	Stressed	Onset	k	s	0.0154997	0.27638
	Stressed	Onset	l	iː	0.0641355	1
	Stressed	Onset	l	ɛ̝	0.0610474	0.951851
	Stressed	Onset	l	eː	0.0602087	0.938774
	Stressed	Onset	l	ɑː	0.0598696	0.933487
	Stressed	Onset	l	a	0.059411	0.926336
	Stressed	Onset	l	ɔ	0.0585138	0.912347
	Stressed	Onset	l	ɛː	0.0584122	0.910763
	Stressed	Onset	l	ɪ	0.0582913	0.908878
	Stressed	Onset	l	oː	0.0572466	0.892589
	Stressed	Onset	l	ʉː	0.0560913	0.874576
	Stressed	Onset	l	ɵ	0.0560055	0.873238
	Stressed	Onset	l	ʏ	0.0549407	0.856635
	Stressed	Onset	l	øː	0.0544689	0.849279
	Stressed	Onset	l	uː	0.0525449	0.819281
	Stressed	Onset	l	ø̞	0.0517451	0.806809
	Stressed	Onset	l	yː	0.0502296	0.783181
	Stressed	Onset	l	ʊ	0.0475812	0.741886
	Stressed	Onset	l	a͡uː	0.0392565	0.612087
	Stressed	Onset	ɭ	ɑː	0.0907209	1
	Stressed	Onset	ɭ	øː	0.0749015	0.825626
	Stressed	Onset	ɭ	iː	0.0721176	0.79494
	Stressed	Onset	ɭ	ø̞	0.0707478	0.779841
	Stressed	Onset	ɭ	ɪ	0.0700103	0.771711
	Stressed	Onset	ɭ	oː	0.0683653	0.753578
	Stressed	Onset	ɭ	eː	0.0673938	0.742869
	Stressed	Onset	ɭ	a	0.0672949	0.74178
	Stressed	Onset	ɭ	ɛ̝	0.0654976	0.721969
	Stressed	Onset	ɭ	ɛː	0.0624448	0.688318
	Stressed	Onset	ɭ	ɵ	0.0591622	0.652135
	Stressed	Onset	ɭ	ʉː	0.0571846	0.630335
	Stressed	Onset	ɭ	ɔ	0.0506723	0.558552
	Stressed	Onset	ɭ	uː	0.048259	0.53195
	Stressed	Onset	ɭ	ʏ	0.0414023	0.456371
	Stressed	Onset	ɭ	yː	0.033825	0.372847
	Stressed	Onset	m	eː	0.0638044	1
	Stressed	Onset	m	ɛ̝	0.0625323	0.980061
	Stressed	Onset	m	a	0.0602662	0.944546
	Stressed	Onset	m	ɑː	0.0597026	0.935712
	Stressed	Onset	m	ɪ	0.059353	0.930234
	Stressed	Onset	m	iː	0.0579733	0.90861
	Stressed	Onset	m	ɔ	0.0573539	0.898901
	Stressed	Onset	m	ʏ	0.054905	0.86052
	Stressed	Onset	m	oː	0.0542039	0.849532
	Stressed	Onset	m	uː	0.0541971	0.849425
	Stressed	Onset	m	øː	0.0510336	0.799844
	Stressed	Onset	m	ø̞	0.0509957	0.79925
	Stressed	Onset	m	yː	0.0490084	0.768104
	Stressed	Onset	m	ɵ	0.048097	0.75382
	Stressed	Onset	m	ʊ	0.0476437	0.746715
	Stressed	Onset	m	ʝ	0.0463926	0.727106
	Stressed	Onset	m	ʉː	0.0453822	0.71127
	Stressed	Onset	m	ɛː	0.0447643	0.701586
	Stressed	Onset	m	a͡uː	0.0323906	0.507655
	Stressed	Onset	n	ʉː	0.0609322	1
	Stressed	Onset	n	oː	0.0605244	0.993307
	Stressed	Onset	n	ɛː	0.0600819	0.986045
	Stressed	Onset	n	iː	0.0580744	0.953099
	Stressed	Onset	n	ɛ̝	0.0575932	0.945201
	Stressed	Onset	n	eː	0.0564367	0.926222
	Stressed	Onset	n	a	0.0564082	0.925753
	Stressed	Onset	n	yː	0.0563218	0.924335
	Stressed	Onset	n	ɑː	0.0558644	0.916829
	Stressed	Onset	n	uː	0.0546112	0.896261
	Stressed	Onset	n	ɔ	0.0545016	0.894462
	Stressed	Onset	n	ʏ	0.0541382	0.888499
	Stressed	Onset	n	ɪ	0.0513548	0.842818
	Stressed	Onset	n	ø̞	0.0499242	0.819341
	Stressed	Onset	n	ʝ	0.0494966	0.812323
	Stressed	Onset	n	øː	0.0491379	0.806436
	Stressed	Onset	n	ɵ	0.0482871	0.792473
	Stressed	Onset	n	ʊ	0.0386164	0.63376
	Stressed	Onset	n	a͡uː	0.0276948	0.454518
	Stressed	Onset	ɳ	ʏ	0.118992	1
	Stressed	Onset	ɳ	a	0.111146	0.93406
	Stressed	Onset	ɳ	ɪ	0.107038	0.89954
	Stressed	Onset	ɳ	ɛ̝	0.103415	0.869093
	Stressed	Onset	ɳ	ø̞	0.102308	0.859784
	Stressed	Onset	ɳ	ɛː	0.100412	0.843853
	Stressed	Onset	ɳ	øː	0.0853224	0.717042
	Stressed	Onset	ɳ	ɵ	0.0837886	0.704152
	Stressed	Onset	ɳ	ɔ	0.0667666	0.561101
	Stressed	Onset	ɳ	a͡uː	0.0664402	0.558358
	Stressed	Onset	ɳ	oː	0.0543713	0.456931
	Stressed	Onset	ŋ	ɛ̝	0.166074	1
	Stressed	Onset	ŋ	oː	0.152824	0.920214
	Stressed	Onset	ŋ	ɑː	0.150496	0.906198
	Stressed	Onset	ŋ	øː	0.119283	0.718251
	Stressed	Onset	ŋ	ɛː	0.105273	0.633891
	Stressed	Onset	ŋ	a	0.0870706	0.524288
	Stressed	Onset	ŋ	uː	0.0856307	0.515618
	Stressed	Onset	ŋ	eː	0.071564	0.430916
	Stressed	Onset	ŋ	ø̞	0.0617856	0.372036
	Stressed	Onset	p	oː	0.0578666	1
	Stressed	Onset	p	r	0.0503171	0.869535
	Stressed	Onset	p	a	0.0497226	0.859262
	Stressed	Onset	p	l	0.049405	0.853774
	Stressed	Onset	p	eː	0.0483694	0.835877
	Stressed	Onset	p	ɛ̝	0.0476894	0.824126
	Stressed	Onset	p	ɑː	0.0473932	0.819006
	Stressed	Onset	p	ɔ	0.0470038	0.812277
	Stressed	Onset	p	ɛː	0.0454995	0.786281
	Stressed	Onset	p	ɵ	0.045188	0.780899
	Stressed	Onset	p	ɪ	0.0443295	0.766064
	Stressed	Onset	p	iː	0.0417303	0.721145
	Stressed	Onset	p	ʊ	0.0403861	0.697916
	Stressed	Onset	p	uː	0.0392249	0.677851
	Stressed	Onset	p	ʏ	0.038794	0.670403
	Stressed	Onset	p	a͡uː	0.037654	0.650703
	Stressed	Onset	p	s	0.0375445	0.64881
	Stressed	Onset	p	øː	0.0370474	0.64022
	Stressed	Onset	p	ʉː	0.0362968	0.627249
	Stressed	Onset	p	yː	0.0362273	0.626048
	Stressed	Onset	p	ʝ	0.0348488	0.602226
	Stressed	Onset	p	t	0.0268376	0.463783
	Stressed	Onset	p	ø̞	0.0231182	0.399508
	Stressed	Onset	p	f	0.0157164	0.271598
	Stressed	Onset	p	m	0.01477	0.255242
	Stressed	Onset	p	e͡ʉː	0.0070197	0.121308
	Stressed	Onset	r	ɛ̝	0.0606003	1
	Stressed	Onset	r	oː	0.0605465	0.999112
	Stressed	Onset	r	ɑː	0.0601836	0.993124
	Stressed	Onset	r	eː	0.0594247	0.980601
	Stressed	Onset	r	a	0.0592111	0.977076
	Stressed	Onset	r	iː	0.0590885	0.975053
	Stressed	Onset	r	ɪ	0.0588742	0.971517
	Stressed	Onset	r	uː	0.0587967	0.970238
	Stressed	Onset	r	ɵ	0.0569642	0.939998
	Stressed	Onset	r	ɛː	0.055992	0.923956
	Stressed	Onset	r	ɔ	0.055513	0.916052
	Stressed	Onset	r	ø̞	0.055008	0.907719
	Stressed	Onset	r	øː	0.0545822	0.900692
	Stressed	Onset	r	ʉː	0.0541042	0.892805
	Stressed	Onset	r	ʏ	0.0538035	0.887843
	Stressed	Onset	r	yː	0.0514933	0.84972
	Stressed	Onset	r	ʊ	0.0485906	0.801821
	Stressed	Onset	r	a͡uː	0.0372234	0.614245
	Stressed	Onset	s	ɛ̝	0.0448572	1
	Stressed	Onset	s	ɔ	0.044616	0.994624
	Stressed	Onset	s	oː	0.0442471	0.986399
	Stressed	Onset	s	k	0.0439046	0.978765
	Stressed	Onset	s	t	0.0434306	0.968198
	Stressed	Onset	s	eː	0.0427544	0.953122
	Stressed	Onset	s	a	0.0415787	0.926913
	Stressed	Onset	s	ɪ	0.0406059	0.905226
	Stressed	Onset	s	iː	0.0404563	0.901892
	Stressed	Onset	s	v	0.0403407	0.899314
	Stressed	Onset	s	l	0.0400594	0.893043
	Stressed	Onset	s	p	0.0395865	0.8825
	Stressed	Onset	s	n	0.0394123	0.878617
	Stressed	Onset	s	ɑː	0.0389599	0.868531
	Stressed	Onset	s	m	0.0385392	0.859153
	Stressed	Onset	s	ʉː	0.0369153	0.822951
	Stressed	Onset	s	øː	0.0368587	0.821691
	Stressed	Onset	s	uː	0.0358742	0.799743
	Stressed	Onset	s	ɛː	0.0358066	0.798235
	Stressed	Onset	s	ʏ	0.0357978	0.79804
	Stressed	Onset	s	yː	0.0353464	0.787976
	Stressed	Onset	s	ø̞	0.0350665	0.781738
	Stressed	Onset	s	ɵ	0.0344594	0.768203
	Stressed	Onset	s	a͡uː	0.0275444	0.614046
	Stressed	Onset	s	ʊ	0.026528	0.591389
	Stressed	Onset	s	f	0.0220263	0.491031
	Stressed	Onset	s	r	0.0144276	0.321634
	Stressed	Onset	ʂ	øː	0.056817	1
	Stressed	Onset	ʂ	ɔ	0.0566451	0.996974
	Stressed	Onset	ʂ	uː	0.055648	0.979425
	Stressed	Onset	ʂ	ɛ̝	0.0549079	0.9664
	Stressed	Onset	ʂ	a	0.0505183	0.889141
	Stressed	Onset	ʂ	ɑː	0.0501126	0.882
	Stressed	Onset	ʂ	ɭ	0.049392	0.869318
	Stressed	Onset	ʂ	eː	0.0461396	0.812074
	Stressed	Onset	ʂ	ɪ	0.045953	0.808789
	Stressed	Onset	ʂ	ɛː	0.0450997	0.793771
	Stressed	Onset	ʂ	iː	0.0429763	0.756399
	Stressed	Onset	ʂ	oː	0.0429489	0.755915
	Stressed	Onset	ʂ	ʈ	0.0421265	0.741443
	Stressed	Onset	ʂ	ɳ	0.0413379	0.727562
	Stressed	Onset	ʂ	ɵ	0.0402978	0.709256
	Stressed	Onset	ʂ	ø̞	0.0391387	0.688856
	Stressed	Onset	ʂ	v	0.0385836	0.679085
	Stressed	Onset	ʂ	ʏ	0.0380291	0.669327
	Stressed	Onset	ʂ	yː	0.0350404	0.616725
	Stressed	Onset	ʂ	m	0.0296976	0.522689
	Stressed	Onset	ʂ	ʉː	0.0293001	0.515693
	Stressed	Onset	ʂ	ʊ	0.0288633	0.508004
	Stressed	Onset	ʂ	r	0.02513	0.442297
	Stressed	Onset	ʂ	a͡uː	0.0152964	0.269223
	Stressed	Onset	t	ɪ	0.0534528	1
	Stressed	Onset	t	r	0.0519799	0.972446
	Stressed	Onset	t	ɑː	0.0517875	0.968845
	Stressed	Onset	t	ɛ̝	0.0507379	0.94921
	Stressed	Onset	t	iː	0.0501533	0.938274
	Stressed	Onset	t	eː	0.0488995	0.914816
	Stressed	Onset	t	uː	0.0488753	0.914364
	Stressed	Onset	t	a	0.0488262	0.913446
	Stressed	Onset	t	ʏ	0.0473285	0.885426
	Stressed	Onset	t	v	0.0468179	0.875875
	Stressed	Onset	t	ɔ	0.0467763	0.875097
	Stressed	Onset	t	yː	0.0462958	0.866107
	Stressed	Onset	t	oː	0.0461305	0.863014
	Stressed	Onset	t	ʉː	0.0460571	0.861641
	Stressed	Onset	t	ɵ	0.0445566	0.83357
	Stressed	Onset	t	ɛː	0.0441177	0.82536
	Stressed	Onset	t	ø̞	0.042927	0.803083
	Stressed	Onset	t	øː	0.0416805	0.779764
	Stressed	Onset	t	ʊ	0.0386431	0.722939
	Stressed	Onset	t	ɕ	0.0311404	0.582578
	Stressed	Onset	t	ʝ	0.0269635	0.504436
	Stressed	Onset	t	a͡uː	0.0254254	0.475662
	Stressed	Onset	t	s	0.0204271	0.382153
	Stressed	Onset	ʈ	r	0.0844022	1
	Stressed	Onset	ʈ	ɑː	0.0842951	0.998731
	Stressed	Onset	ʈ	iː	0.0803901	0.952465
	Stressed	Onset	ʈ	ɪ	0.0773952	0.916981
	Stressed	Onset	ʈ	a	0.0761367	0.90207
	Stressed	Onset	ʈ	ɛ̝	0.075896	0.899218
	Stressed	Onset	ʈ	uː	0.0633531	0.75061
	Stressed	Onset	ʈ	eː	0.0571009	0.676533
	Stressed	Onset	ʈ	ɔ	0.0544494	0.645118
	Stressed	Onset	ʈ	oː	0.0500477	0.592966
	Stressed	Onset	ʈ	ɛː	0.0486597	0.576521
	Stressed	Onset	ʈ	ʉː	0.0418638	0.496003
	Stressed	Onset	ʈ	ø̞	0.0408925	0.484496
	Stressed	Onset	ʈ	øː	0.0405466	0.480398
	Stressed	Onset	ʈ	yː	0.0394312	0.467182
	Stressed	Onset	ʈ	ɵ	0.0347569	0.411801
	Stressed	Onset	ʈ	ʏ	0.029529	0.34986
	Stressed	Onset	ʈ	ʂ	0.0208541	0.247081
	Stressed	Onset	v	ɑː	0.071015	1
	Stressed	Onset	v	ɛ̝	0.0695593	0.979502
	Stressed	Onset	v	iː	0.0693697	0.976832
	Stressed	Onset	v	ɪ	0.0673176	0.947935
	Stressed	Onset	v	a	0.066925	0.942406
	Stressed	Onset	v	ɛː	0.0651542	0.91747
	Stressed	Onset	v	oː	0.063882	0.899556
	Stressed	Onset	v	eː	0.062313	0.877463
	Stressed	Onset	v	ɵ	0.0534954	0.753297
	Stressed	Onset	v	ɔ	0.0516884	0.727852
	Stressed	Onset	v	uː	0.0505157	0.711338
	Stressed	Onset	v	øː	0.0504882	0.710951
	Stressed	Onset	v	r	0.0472864	0.665865
	Stressed	Onset	v	ʊ	0.0423361	0.596157
	Stressed	Onset	v	yː	0.0401873	0.565898
	Stressed	Onset	v	ø̞	0.0364658	0.513495
	Stressed	Onset	v	ʉː	0.0336375	0.473668
	Stressed	Onset	v	l	0.0317478	0.447058
	Stressed	Onset	v	ʏ	0.0266154	0.374785
	Stressed	Nucleus	a	nː	0.0579202	1
	Stressed	Nucleus	a	tː	0.0576783	0.995824
	Stressed	Nucleus	a	lː	0.0548498	0.946988
	Stressed	Nucleus	a	mː	0.0529915	0.914905
	Stressed	Nucleus	a	dː	0.0518805	0.895722
	Stressed	Nucleus	a	kː	0.0517103	0.892786
	Stressed	Nucleus	a	sː	0.0507929	0.876946
	Stressed	Nucleus	a	rː	0.0505855	0.873364
	Stressed	Nucleus	a	ŋː	0.0479705	0.828217
	Stressed	Nucleus	a	pː	0.0479551	0.82795
	Stressed	Nucleus	a	fː	0.0473154	0.816906
	Stressed	Nucleus	a	ɳː	0.0470689	0.81265
	Stressed	Nucleus	a	ʝː	0.0466036	0.804617
	Stressed	Nucleus	a	ʈː	0.0451354	0.779268
	Stressed	Nucleus	a	ɱː	0.0445855	0.769774
	Stressed	Nucleus	a	_	0.0437768	0.755812
	Stressed	Nucleus	a	bː	0.0425325	0.734328
	Stressed	Nucleus	a	ɡː	0.0421052	0.726952
	Stressed	Nucleus	a	ʂː	0.0410915	0.709451
	Stressed	Nucleus	a	vː	0.033566	0.579522
	Stressed	Nucleus	a	ɧː	0.0259974	0.448849
	Stressed	Nucleus	a	ɖː	0.0158871	0.274293
	Stressed	Nucleus	ɑː	ɡ	0.0313743	1
	Stressed	Nucleus	ɑː	r	0.0303518	0.96741
	Stressed	Nucleus	ɑː	n	0.030034	0.95728
	Stressed	Nucleus	ɑː	_	0.0296768	0.945894
	Stressed	Nucleus	ɑː	.r	0.0290368	0.925495
	Stressed	Nucleus	ɑː	v	0.0285924	0.911332
	Stressed	Nucleus	ɑː	.ɡ	0.0275591	0.878399
	Stressed	Nucleus	ɑː	d	0.0272319	0.86797
	Stressed	Nucleus	ɑː	.k	0.0265978	0.847757
	Stressed	Nucleus	ɑː	ʈ	0.0265778	0.847121
	Stressed	Nucleus	ɑː	.t	0.0264896	0.844309
	Stressed	Nucleus	ɑː	l	0.0260876	0.831497
	Stressed	Nucleus	ɑː	.l	0.0260101	0.829025
	Stressed	Nucleus	ɑː	k	0.0254211	0.810253
	Stressed	Nucleus	ɑː	ɳ	0.0252823	0.80583
	Stressed	Nucleus	ɑː	t	0.0252367	0.804376
	Stressed	Nucleus	ɑː	.d	0.0249805	0.796211
	Stressed	Nucleus	ɑː	.n	0.0248015	0.790505
	Stressed	Nucleus	ɑː	.p	0.0234289	0.746755
	Stressed	Nucleus	ɑː	.m	0.0231618	0.73824
	Stressed	Nucleus	ɑː	s	0.0230378	0.734289
	Stressed	Nucleus	ɑː	ɭ	0.0229026	0.72998
	Stressed	Nucleus	ɑː	.s	0.0228949	0.729735
	Stressed	Nucleus	ɑː	.v	0.0228461	0.728181
	Stressed	Nucleus	ɑː	m	0.0225046	0.717296
	Stressed	Nucleus	ɑː	ɖ	0.0224624	0.715949
	Stressed	Nucleus	ɑː	p	0.0222215	0.708271
	Stressed	Nucleus	ɑː	ʂ	0.022043	0.702581
	Stressed	Nucleus	ɑː	.b	0.0204866	0.652975
	Stressed	Nucleus	ɑː	.ʂ	0.020468	0.652383
	Stressed	Nucleus	ɑː	.f	0.0199233	0.635021
	Stressed	Nucleus	ɑː	.ʝ	0.0196232	0.625456
	Stressed	Nucleus	ɑː	f	0.0192332	0.613025
	Stressed	Nucleus	ɑː	.ɛ̝	0.0192256	0.612783
	Stressed	Nucleus	ɑː	.ʊ	0.0185129	0.590065
	Stressed	Nucleus	ɑː	.a	0.0171915	0.547947
	Stressed	Nucleus	ɑː	b	0.0170712	0.544116
	Stressed	Nucleus	ɑː	.e̞	0.0170695	0.544059
	Stressed	Nucleus	ɑː	ɱ	0.015693	0.500186
	Stressed	Nucleus	ɑː	.h	0.015519	0.49464
	Stressed	Nucleus	ɑː	ŋ	0.0151172	0.481833
	Stressed	Nucleus	ɑː	.ʉ̞	0.011845	0.377538
	Stressed	Nucleus	ɑː	.i	0.0118342	0.377195
	Stressed	Nucleus	ɑː	.ɪ	0.0117042	0.37305
	Stressed	Nucleus	ɑː	.ɵ	0.0106365	0.339021
	Stressed	Nucleus	a͡uː	s	0.0537009	1
	Stressed	Nucleus	a͡uː	n	0.0529495	0.986009
	Stressed	Nucleus	a͡uː	.d	0.0526791	0.980973
	Stressed	Nucleus	a͡uː	t	0.049843	0.928159
	Stressed	Nucleus	a͡uː	.l	0.0495108	0.921975
	Stressed	Nucleus	a͡uː	_	0.0488485	0.90964
	Stressed	Nucleus	a͡uː	.s	0.0477747	0.889644
	Stressed	Nucleus	a͡uː	.r	0.0474821	0.884195
	Stressed	Nucleus	a͡uː	.ɡ	0.0474812	0.88418
	Stressed	Nucleus	a͡uː	.t	0.0441883	0.82286
	Stressed	Nucleus	a͡uː	.e̞	0.0432108	0.804658
	Stressed	Nucleus	a͡uː	.b	0.0400479	0.745758
	Stressed	Nucleus	a͡uː	.m	0.0391465	0.728973
	Stressed	Nucleus	a͡uː	.n	0.0389313	0.724965
	Stressed	Nucleus	a͡uː	l	0.0367835	0.68497
	Stressed	Nucleus	a͡uː	.h	0.0366364	0.682231
	Stressed	Nucleus	a͡uː	ɡ	0.034029	0.633678
	Stressed	Nucleus	a͡uː	.k	0.0331578	0.617454
	Stressed	Nucleus	a͡uː	.ɪ	0.0320757	0.597304
	Stressed	Nucleus	a͡uː	m	0.0297941	0.554816
	Stressed	Nucleus	a͡uː	ɳ	0.0271169	0.504962
	Stressed	Nucleus	a͡uː	r	0.026896	0.500848
	Stressed	Nucleus	a͡uː	d	0.0265866	0.495088
	Stressed	Nucleus	a͡uː	.p	0.0226739	0.422225
	Stressed	Nucleus	a͡uː	k	0.0214867	0.400118
	Stressed	Nucleus	a͡uː	.v	0.0169689	0.315989
	Stressed	Nucleus	ɔ	kː	0.0644306	1
	Stressed	Nucleus	ɔ	mː	0.0641014	0.99489
	Stressed	Nucleus	ɔ	ŋː	0.0567	0.880016
	Stressed	Nucleus	ɔ	lː	0.0564803	0.876606
	Stressed	Nucleus	ɔ	tː	0.0554297	0.860301
	Stressed	Nucleus	ɔ	sː	0.0553374	0.858868
	Stressed	Nucleus	ɔ	rː	0.0551276	0.855612
	Stressed	Nucleus	ɔ	nː	0.0546553	0.848282
	Stressed	Nucleus	ɔ	pː	0.0545907	0.847279
	Stressed	Nucleus	ɔ	bː	0.0527547	0.818783
	Stressed	Nucleus	ɔ	ʈː	0.052598	0.816351
	Stressed	Nucleus	ɔ	ɡː	0.0515324	0.799813
	Stressed	Nucleus	ɔ	fː	0.0506236	0.785708
	Stressed	Nucleus	ɔ	ʝː	0.0479882	0.744804
	Stressed	Nucleus	ɔ	ʂː	0.0473901	0.735522
	Stressed	Nucleus	ɔ	dː	0.0438207	0.680123
	Stressed	Nucleus	ɔ	vː	0.0376405	0.584202
	Stressed	Nucleus	ɔ	ɧː	0.0296692	0.460483
	Stressed	Nucleus	ɔ	ɳː	0.028115	0.436361
	Stressed	Nucleus	ɔ	ɱː	0.0247755	0.384531
	Stressed	Nucleus	ɔ	ɭː	0.0162394	0.252045
	Stressed	Nucleus	e̞	tː	0.605178	1
	Stressed	Nucleus	e̞	nː	0.394822	0.652406
	Stressed	Nucleus	eː	n	0.0288179	1
	Stressed	Nucleus	eː	d	0.0275141	0.954756
	Stressed	Nucleus	eː	_	0.0267774	0.929192
	Stressed	Nucleus	eː	.r	0.0263718	0.915116
	Stressed	Nucleus	eː	r	0.0261467	0.907306
	Stressed	Nucleus	eː	.d	0.0255169	0.885452
	Stressed	Nucleus	eː	l	0.0252849	0.877402
	Stressed	Nucleus	eː	.l	0.0250302	0.868562
	Stressed	Nucleus	eː	t	0.0248718	0.863068
	Stressed	Nucleus	eː	.t	0.024806	0.860783
	Stressed	Nucleus	eː	.n	0.0245815	0.852994
	Stressed	Nucleus	eː	v	0.0245349	0.851375
	Stressed	Nucleus	eː	.v	0.0228113	0.791565
	Stressed	Nucleus	eː	.ɡ	0.0227194	0.788378
	Stressed	Nucleus	eː	k	0.0222983	0.773766
	Stressed	Nucleus	eː	.k	0.0219639	0.762162
	Stressed	Nucleus	eː	ɡ	0.0218149	0.756991
	Stressed	Nucleus	eː	m	0.0217558	0.75494
	Stressed	Nucleus	eː	.m	0.0215551	0.747975
	Stressed	Nucleus	eː	.s	0.0214651	0.744854
	Stressed	Nucleus	eː	s	0.0207653	0.720567
	Stressed	Nucleus	eː	.a	0.0206431	0.716327
	Stressed	Nucleus	eː	.e̞	0.0204735	0.710441
	Stressed	Nucleus	eː	.f	0.0191139	0.663264
	Stressed	Nucleus	eː	.p	0.0190352	0.660533
	Stressed	Nucleus	eː	.b	0.0188745	0.654957
	Stressed	Nucleus	eː	.ʂ	0.018629	0.646439
	Stressed	Nucleus	eː	.ɛ̝	0.0186107	0.645802
	Stressed	Nucleus	eː	p	0.0180528	0.626444
	Stressed	Nucleus	eː	.ɧ	0.0180508	0.626373
	Stressed	Nucleus	eː	ɱ	0.0177585	0.616231
	Stressed	Nucleus	eː	f	0.0175916	0.610439
	Stressed	Nucleus	eː	ʈ	0.0174239	0.60462
	Stressed	Nucleus	eː	.ʊ	0.0173598	0.602395
	Stressed	Nucleus	eː	.ɔ	0.017073	0.592443
[truncated: 3,394 more rows]
